# Supplementary material
Source: HighWire-hosted journal article supplement (https://www.cfp.ca/highwire/filestream/35490/field_highwire_adjunct_files/4/341_T2DM_Comparison_Summary.pdf)
Supplement: 341_T2DM_Comparison_Summary.pdf [file 341_T2DM_Comparison_Summary.pdf]

**ANTI-HYPERGLYCEMIC DIABETES AGENTS in T2DM: Outcomes Comparison Summary Table**

| Drug Class                                 |                                             | Sulfonylureas                                                                 |                     | TZDs                                                                                   |                                                                         |                                    | Meglitinides          | DPP4 Inhibitors                                                                                                                                                                      | GLP1 Agonists ***                                                                                                                                                  | SGLT2 Inhibitors ***                                                                                                                                                     | Insulin in T2DM                                                                                                                           |                                                                                                                                            |
|--------------------------------------------|---------------------------------------------|-------------------------------------------------------------------------------|---------------------|----------------------------------------------------------------------------------------|-------------------------------------------------------------------------|------------------------------------|-----------------------|--------------------------------------------------------------------------------------------------------------------------------------------------------------------------------------|--------------------------------------------------------------------------------------------------------------------------------------------------------------------|--------------------------------------------------------------------------------------------------------------------------------------------------------------------------|-------------------------------------------------------------------------------------------------------------------------------------------|--------------------------------------------------------------------------------------------------------------------------------------------|
| Generic → BRAND                            | Metformin (MF) GLUCOPHAGE                   | Gliclazide DIAMICRON                                                          | Glyburide DIABETA   | Pioglitazone ACTOS                                                                     | Rosiglitazone AVANDIA                                                   | Acarbose GLUCOBAY                  | Repaglinide GLUCONORM | Saxagliptin ONGLYZA<br>Sitagliptin JANUVIA<br>Alogliptin NESINA<br>Linagliptin TRAJENTA                                                                                              | Liraglutide VICTOZA<br>Exenatide BYETTA, BYDUREON<br>Dulaglutide TRULICITY<br>Semaglutide OZEMPIC, RYBELSUS (PO)<br>Lixisenatide ADLYXINE; ALBIGLUTIDE D/C         | Empagliflozin JARDIANCE<br>Canagliflozin INVOKANA<br>Dapagliflozin FORXIGA, FARXIGA<br>Ertugliflozin STEGLATRO                                                           | Intensity: <u>Less</u> (NPH HS + MF)                                                                                                      | Intensity: <u>More</u> (Multiple daily doses)                                                                                              |
| Major trials to support findings/Outcomes* | UKPDS-33,34,80 (ADOPT; some use in ADVANCE) | ADVANCE                                                                       | UKPDS-33,80 (ADOPT) | ProACTIVE<br>Ferwana M. Meta-analysis 2013. SR-Liao 2017; IRIS                         | Meta-analysis. RECORD interim, ADOPT, DREAM                             | ACE (Prevention trial: Stop-NIDDM) | -                     | SAVOR-TIMI 53, TECOS, EXAMINE PROLOGUE, CARMELINA, CAROLINA                                                                                                                          | LEADER, EXSCEL, FREEDOM CVO, REWIND, SUSTAIN-6, PIONEER-6, ELIXA, HARMONY                                                                                          | EMPA-REG, CANVAS, CREDENCE, DECLARE, DAPA-HF, VERTIS-CV (2019), DAPA-CKD (2020), EMPEROR-Reduced & -Preserved (2020), EMPA-Kidney (2022)                                 | T2DM: UKPDS-33,80; ADVANCE, ACCORD, VADT, ORIGIN, DEVOTE<br>T1DM: DCCT/EDIC<br>(Also Boussageon et al. Meta-analysis. BMJ 2011;343:d4169) |                                                                                                                                            |
| ↓ Risk of Death / Major CV <sup>1</sup>    |                                             | ✓3,4,5<br>X <sup>25,6</sup> glipizide ↑ MACE vs MF NNH=10/5yr (SPREAD-DIMCAD) | ✓4,5                | 2.9yr,<br>composite NS<br>↓ MACE (IRIS) (pts with insulin resistance & recent CVA/TIA) |                                                                         | established CVD (Chinese)          |                       | ✓10,11 saxagliptin, alogliptin, sitagliptin, linagliptin ↔ non-inferior to placebo for MACE, But see ?HF below.<br>✓11 linagliptin vs glimepiride (CAROLINA) ↔ non-inferior for MACE | ✓✓✓22 liraglutide ↓ MACE NNT=53/3.8yr & ↓ mortality NNT=72/3.8yr LEADER, semaglutide SC w/ly ↓ MACE NNT=44/2.1yr SUSTAIN-6, dulaglutide ↓ MACE NNT=72/5.4yr REWIND | ✓✓✓15 empagliflozin ↓ MACE NNT=63/3.1yr, ↓ mortality NNT=39/3.1yr (EMPA-REG) canagliflozin ↓ MACE NNT=220/yr (CANVAS) but mortality NS<br>dapagliflozin ↔ MACE (DECLARE) |                                                                                                                                           | X <sup>21</sup> > insulin use with intensive target vs standard therapy, ↑ all-cause death NNH=95/3.5yr, & CV death NNH=125/3.5yr (ACCORD) |
| Effect on A1C**                            |                                             |                                                                               |                     |                                                                                        |                                                                         |                                    | ✓✓                    |                                                                                                                                                                                      |                                                                                                                                                                    |                                                                                                                                                                          |                                                                                                                                           |                                                                                                                                            |
| Weight (loss vs neutral vs gain)           |                                             |                                                                               |                     |                                                                                        |                                                                         |                                    |                       |                                                                                                                                                                                      |                                                                                                                                                                    |                                                                                                                                                                          |                                                                                                                                           |                                                                                                                                            |
| Risk of Hypoglycemia                       |                                             |                                                                               |                     | ✓✓<br>Low risk w monother                                                              |                                                                         |                                    |                       |                                                                                                                                                                                      |                                                                                                                                                                    |                                                                                                                                                                          |                                                                                                                                           |                                                                                                                                            |
| ↓ Risk of HF /Edema                        |                                             |                                                                               |                     | X <sup>26</sup> ↑ HF NNH=50/2.9yr, edema NNH=8/2.9yr                                   | X <sup>25,27</sup> ↑ HF NNH=69/5.3yr (RECORD), ↑ HF NNH=250/3yr (DREAM) |                                    |                       | X <sup>30</sup> ↑ HF saxagliptin NNH=143/2.1yr (SAVOR), alogliptin (EXAMINE posthoc)                                                                                                 | ✓31<br>Entire class of GLP1 agonists neutral for HF hospitalizations.                                                                                              |                                                                                                                                                                          |                                                                                                                                           |                                                                                                                                            |
| Effect on GI tolerability                  |                                             |                                                                               |                     |                                                                                        |                                                                         |                                    |                       |                                                                                                                                                                                      |                                                                                                                                                                    |                                                                                                                                                                          |                                                                                                                                           |                                                                                                                                            |
| Cost                                       |                                             |                                                                               |                     |                                                                                        |                                                                         |                                    |                       |                                                                                                                                                                                      |                                                                                                                                                                    |                                                                                                                                                                          |                                                                                                                                           |                                                                                                                                            |
|                                            | hold or ↓ dose<br><br>T2DM (UKPDS-34)       |                                                                               |                     | X FDA +/- HC warnings: <sup>35</sup><br>fractures ♀ (NNH~30/~3.5 y)                    |                                                                         |                                    |                       | FDA +/- HC warning:<br><br>X new agents – outcome & safety data still limited                                                                                                        |                                                                                                                                                                    | ✓✓✓46 canagliflozin ↓ ESRD, doubled SCr & renal/CV death NNT= 23/2.6 yrs (CREDENCE)                                                                                      |                                                                                                                                           |                                                                                                                                            |
| Overall                                    | ✓✓✓?                                        | ✓✓                                                                            | ✓                   | ✓?                                                                                     | X?                                                                      | ✓                                  | ✓                     | ✓                                                                                                                                                                                    | ? ✓✓ liraglutide (CV + mortality benefit), semaglutide SC (CV benefit, NIHB coverage ▼)                                                                            | ? ✓✓ empagliflozin (CV + mortality benefit, SKH ☎ & NIHB coverage ▼)                                                                                                     | ✓                                                                                                                                         | ✓✓<br>X?                                                                                                                                   |

\*Drugs that lower blood glucose come with various levels of evidence regarding their balance of benefits & harms. This chart relies on current evidence, especially from randomized controlled trials that have evaluated patient oriented outcomes. Direct comparisons between agents have not been done so one is left to evaluate each drug for its relative advantages & disadvantages. \*\*A1C will vary depending on dose, combinations & initial A1C. \*\*\*See next page for breakout GLP1 & SGLT2 data. See full version of this ANTI-HYPERGLYCEMIC DIABETES AGENTS: Outcomes Comparison Summary Table online for additional notes: <http://www.rxfiles.ca/rxfiles/uploads/documents/Diabetes-Agents-Outcomes-Comparison-Summary-Table.pdf>  
See also: RxFiles Diabetes Landmark Trials Summary at: <http://www.rxfiles.ca/rxfiles/uploads/documents/CHT-Diabetes-Landmark-Trials-Links.pdf> Diabetes Oral Agents Comparison Chart: <http://www.rxfiles.ca/rxfiles/uploads/documents/members/cht-diabetes.pdf>

An Advantage  
✓✓✓
Neutral  
✓
A Disadvantage  
XX
Unknown/Ongoing  
?

\*\*\*See next page for GLP1 & SGLT2 color comparison chart

**Individualize approach considering balance of potential benefits & harms. Over-aggressive pursuit of targets can ↑ mortality.** ACCORD

| Drug Class                                                         | GLP1 Agonists                                                                                                                                                                                                                                                                                                                            |                                                                             |                                                                              |                                                                                                                 | SGLT2 Inhibitors                                                                                                                                                                                              |                                                                                                  |                                                    |
|--------------------------------------------------------------------|------------------------------------------------------------------------------------------------------------------------------------------------------------------------------------------------------------------------------------------------------------------------------------------------------------------------------------------|-----------------------------------------------------------------------------|------------------------------------------------------------------------------|-----------------------------------------------------------------------------------------------------------------|---------------------------------------------------------------------------------------------------------------------------------------------------------------------------------------------------------------|--------------------------------------------------------------------------------------------------|----------------------------------------------------|
| Generic → BRAND                                                    | Dulaglutide SC<br>TRULICITY (SC WEEKLY)                                                                                                                                                                                                                                                                                                  | Liraglutide SC<br>VICTOZA (SC DAILY)                                        | Semaglutide SC<br>OZEMPIC (SC WEEKLY)                                        | Semaglutide PO 1.4mg<br>RYBELSUS (PO DAILY) FDA; new Canada                                                     | Canagliflozin<br>INVOKANA                                                                                                                                                                                     | Dapagliflozin<br>FORXIGA / FARXIGA FDA                                                           | Empagliflozin<br>JARDIANCE                         |
| Major trial(s) to support findings/Outcomes*                       | REWIND n=9901 / 5.4 yr                                                                                                                                                                                                                                                                                                                   | LEADER n=9340 / 3.8 yr vs placebo (but ↑ insulin use)                       | SUSTAIN-6 n=3297 / 2 yr vs placebo (but ↑ insulin use)                       | PIONEER-6 n=3183 / 1.3 yr                                                                                       | CANVAS n=10142 / 3.6 yr<br>CREDENCE n=4401 / 2.6 yr renal dx pts                                                                                                                                              | DECLARE-TIMI n=17160 / 4.2 yr<br>DAPA-HF n=4744 / 1.5 yr heart failure pts                       | EMPA-REG n=7020 / 3.1 yr                           |
| ↓ Risk of Major CV MACE                                            | ✓✓✓↓ MACE<br>NNT=72/5.4yrs<br>? N. America - neutral<br>HR: 1.14 (0.89-1.47)                                                                                                                                                                                                                                                             | ✓✓✓↓ MACE<br>NNT=53/3.8yr<br>? N. America - neutral<br>HR: 1.01 (0.84-1.22) | ✓✓✓↓ MACE<br>NNT=44/2.1yr<br>? N. America - marginal<br>HR: 0.87 (0.57-1.34) | ✓ MACE<br>Non-inferior to Placebo<br>3.8% vs 4.8%<br>HR: 0.79 (0.57-1.11)<br>Many trial limitations, e.g. short | ✓✓✓↓ MACE<br>NNT~220/yr<br>(=NNT of 62 / 3.6yrs)                                                                                                                                                              | ✓✓✓? MACE<br>Non-inferior to Placebo<br>HR 0.93 (0.84-1.03)<br>Superiority (NS) over 4.2yr       | ✓✓✓↓ MACE<br>NNT=63/3.1yrs<br>10mg as good as 25mg |
| ↓ Risk of All Death                                                | ✓ HR 0.9 (0.80-1.01)<br>10.8% vs 12%/5.4 yrs (NS)                                                                                                                                                                                                                                                                                        | ✓✓✓<br>NNT=72/3.8yrs                                                        | ✓ HR 1.05 (0.74-1.50)<br>3.8% vs 3.6%/2.1yrs (NS)                            | ✓✓✓ 2° endpoint<br>NNT=72/1.3yrs                                                                                | ✓ HR 0.87 (0.74-1.01)<br>HR 0.83 (0.68-1.02)                                                                                                                                                                  | ✓ HR 0.93 (0.82-1.04)                                                                            | ✓✓✓ 2° endpoint<br>NNT=39/3.1yr                    |
| Less Renal Disease (composite/surrogates)                          | ✓ NNT=40/5.4yrs<br>17.1 vs 19.6%/5.4 yrs                                                                                                                                                                                                                                                                                                 | ✓ NNT=67/3.8yr<br>5.7% vs 7.2%/3.8yrs                                       | ✓ NNT=44/2.1yr<br>3.8% vs 6.1%/3.8yr                                         | ?                                                                                                               | ✓✓✓ HR 0.66<br>NNT= 23/2.6 yrs                                                                                                                                                                                | ✓✓✓?class effect<br>HR 0.76 (0.67-0.87)                                                          | ✓✓✓?class effect<br>↓acute renal failure NNT=71    |
| Effect on A1C**                                                    | ✓✓✓                                                                                                                                                                                                                                                                                                                                      | ✓✓✓                                                                         | ✓✓✓                                                                          | ✓✓✓                                                                                                             | ✓✓                                                                                                                                                                                                            | ✓✓                                                                                               | ✓✓                                                 |
| Weight (loss vs neutral vs gain)                                   | ↓1.3-3 kg/5-52 wks                                                                                                                                                                                                                                                                                                                       | ↓ 2.3 kg/3.8 yrs                                                            | ↓ 3-4kg/2.1yrs                                                               | ↓ 3.4kg/1.3 yrs                                                                                                 | ↓ 2.8-4 kg/4-52 wks<br>CANTATA-M                                                                                                                                                                              | ↓ 2 kg/12-52 wks                                                                                 | ↓ ~1.5-2 kg/3.1 yrs                                |
| Less Risk of Hypoglycemia                                          | ✓✓?                                                                                                                                                                                                                                                                                                                                      | Severe: 2.4% vs 3.3% p=0.02<br>(placebo group had more insulin)             | ✓✓?                                                                          | Severe: 1.4% vs 0.8%                                                                                            | Risk when given with sulfonylurea or insulin                                                                                                                                                                  |                                                                                                  |                                                    |
| Less Risk of HF /Edema                                             | ✓<br>HR: 0.93 (0.77-1.22)                                                                                                                                                                                                                                                                                                                | ✓<br>HR: 0.87 (0.73-1.05)                                                   | ✓<br>HR: 1.11 (0.77-1.61)                                                    | ✓<br>HR: 0.86 (0.48-1.55)                                                                                       | 2° endpoint<br>↓HF hospitalizations                                                                                                                                                                           | ↓ worsening HF or CV death<br>NNT=21/1.5yr                                                       | 2° endpoint<br>↓HF hospitalizations                |
| Effect on GI & D/C due to Tolerability                             | X GI<br>D/C due to AE 9% vs 6%<br>NNH=36/5.4yrs                                                                                                                                                                                                                                                                                          | X GI<br>D/C due to AE 9.5% vs 7.3%<br>NNH=46/3.8yrs                         | X GI<br>D/C due to AE 11.5-14.5%<br>vs 5.7-7.6% NNH= ~14/2yrs                | X D/C due to GI: 6.8% vs 1.6%<br>D/C due to AE 11.6% vs 6.5%;<br>NNH=20/1.3yrs                                  | D/C due to AE 12% vs 13%;<br>NNH= ? 100/2.6yrs                                                                                                                                                                | D/C due to AE 8.1% vs 6.9%;<br>NNH=84/4.2yrs                                                     | D/C due to AE 17.3 vs 19.4%;<br>NNH= 48/3.1yrs     |
| ? AE Concerns Associated with Class                                | Adverse Events (AE): injection site irritations if SC; ?/rare: ? ↑ pancreatitis, ?pancreatic cancer; ? ↑ thyroid cancer (liraglutide); <sup>41</sup> gallbladder disease <sup>46</sup> ; ?diabetic retinopathy complications. <sup>SUSTAIN-6</sup> See infographic pg 16. Once weekly agents may have ↓ GI adverse events. <sup>42</sup> |                                                                             |                                                                              |                                                                                                                 | FDA +/- HC warning: ↑DKA; ↑AKI (caution: ↓ intravascular volume & ↓renal fx); Rare: Fournier's gangrene; genital skin infection (OR 3.5 vs placebo) ? ↑UTI/urosepsis/pyelonephritis. See infographic page 17. |                                                                                                  |                                                    |
| Cost 1 month<br><small>Some cost programs may be available</small> | XX<br>\$225 x ⊗                                                                                                                                                                                                                                                                                                                          | XX<br>\$90-\$235 x ⊗                                                        | XX<br>\$120-\$220 x ▼NIHB                                                    | XX<br>\$260 x ⊗                                                                                                 | X<br>\$110                                                                                                                                                                                                    | X<br>\$110 ▼NIHB                                                                                 | X<br>\$110 ▼NIHB                                   |
| Other                                                              | Well tolerated, except GI.<br>↓BP 1.7/0.5 mmHg.<br>Environmental impact - single use disposable pen                                                                                                                                                                                                                                      | Gallbladder AE: NNH=84                                                      | NIHB open benefit                                                            | Smaller, shorter trial. SAE lower in tx group.                                                                  | ?↑(HR ~2) limb amputations<br>?↑fracture (HR 1.3)/↓BMD <sup>HIF</sup>                                                                                                                                         | ↑bladder/ breast cancer (avoid with pioglitazone).<br>HF benefit similar in DM & non-DM patients | NIHB open benefit                                  |
| Practical / Clinical Considerations                                | Upper GI effects often worse than lower GI effects; a low fat diet is better (small, frequent meals, gradual dose titration; patients may struggle with AEs in first ~2 weeks, but many will gain tolerability and do OK. Often insulin dose can be reduced 20% initially, and possibly more after that.                                 |                                                                             |                                                                              |                                                                                                                 | Uncertain multi-mechanism of action e.g. lower BP. Monitor BP and assess for postural hypotension, especially in older adults.                                                                                |                                                                                                  |                                                    |
| Time Tested                                                        | X new agent – outcome & safety data still limited                                                                                                                                                                                                                                                                                        | X ~10yr hx; but... limited real world use                                   | X new agent – outcome & safety data still limited                            | X new agent – outcome & safety data still limited                                                               | X new agents – outcome & safety data still limited                                                                                                                                                            |                                                                                                  |                                                    |
| Convenience                                                        | ✓✓ Single Use Pen SC once weekly                                                                                                                                                                                                                                                                                                         | ✓ SC once daily                                                             | ✓✓ SC once weekly                                                            | ✓✓✓ Oral once daily                                                                                             | ✓✓✓ Oral once daily                                                                                                                                                                                           |                                                                                                  |                                                    |
| Overall                                                            | ?                                                                                                                                                                                                                                                                                                                                        | ?                                                                           | ?                                                                            | ?                                                                                                               | ? Safety                                                                                                                                                                                                      | ?                                                                                                | ?                                                  |

|                     |    |                |   |                      |                      |
|---------------------|----|----------------|---|----------------------|----------------------|
| An Advantage<br>✓✓✓ | ✓✓ | Neutral<br>✓** | X | A Disadvantage<br>XX | Unknown/Ongoing<br>? |
|---------------------|----|----------------|---|----------------------|----------------------|

\*\*Note: the "Neutral" designation is given a checkmark indicating that there is little or no disadvantage; however, there is also little or no advantage.

|               |                                                                                                                                                                             |                  |                                                                                                                                                                                                             |
|---------------|-----------------------------------------------------------------------------------------------------------------------------------------------------------------------------|------------------|-------------------------------------------------------------------------------------------------------------------------------------------------------------------------------------------------------------|
| GLP1 Agonists | <b>REWIND</b><br>Lower risk group; e.g. 21% had past CVD; others higher risk.<br>Renal: macroalbuminuria, eGFR decline 30+%, chronic renal replacement tx                   | SGLT2 Inhibitors | <b>CREDENCE</b><br>Patients with albuminuric CKD, eGFR 30-<90 mL/min, & albuminuria; High risk group: 50% had CVD<br>Renal: canagliflozin – composite primary endpoint: ↓ESRD, doubled Scr & renal/CV death |
|               | <b>LEADER</b><br>High risk group                                                                                                                                            |                  | <b>CANVAS</b><br>High risk group: 66% had established/hx of CVD [1° outcome if no CV disease history, HR= 0.98 (0.74-1.3)]                                                                                  |
|               | <b>SUSTAIN-6</b><br>High risk group: 83% had established CVD, CKD or both                                                                                                   |                  | <b>DECLARE-TIMI</b><br>High risk group: >40% had atherosclerotic CVD; 33% CAD, 6% PAD, 7.6% cerebrovascular dx, 10% HF                                                                                      |
|               | <b>PIONEER-6</b><br>MF: 77%, insulin 60%; Smaller, shorter trial; SAE leading to lower discontinuation rate in tx group, 2.6% vs 3%.<br>Higher risk group: CVD or CKD 84.7% |                  | <b>DAPA-HF</b><br>Both patients with and without diabetes studied; similar benefit in both groups.                                                                                                          |
|               |                                                                                                                                                                             |                  | <b>EMPA-REG</b><br>High risk group: 100% had established CVD. Patients had not received glucose-lowering agents for >12 weeks                                                                               |

## Type 2 Diabetes: Strategies, Drug Therapy, & Tools

### AN OVERVIEW OF TYPE 2 DIABETES

|                                                             |   |
|-------------------------------------------------------------|---|
| Introduction.....                                           | 2 |
| Top Diabetes Clinical Pearls.....                           | 3 |
| Screening, Diagnosis, & Approach to Diabetes Treatment..... | 4 |
| PERSPECTIVES ON Glycemic Targets.....                       | 5 |
| Modifiable Risk Factors in Diabetes.....                    | 6 |
| PERSPECTIVES ON Lifestyle Change.....                       | 7 |
| PERSPECTIVES ON Diabetes & the Kidneys.....                 | 8 |
| PERSPECTIVES ON Diabetes & Heart Failure.....               | 9 |

### PHARMACOTHERAPY (non-insulin)

|                                                       |       |
|-------------------------------------------------------|-------|
| Introduction.....                                     | 10    |
| PERSPECTIVES ON Metformin.....                        | 11    |
| PERSPECTIVES ON GLP1 Agonists & SGLT2 Inhibitors..... | 12-13 |
| Colour Comparison Chart of Pharmacotherapy.....       | 14-15 |
| 🔗 GLP1 Agonist Adverse Effects: Infographic.....      | 16    |
| 🔗 SGLT2 Inhibitor Adverse Effects: Infographic.....   | 17    |
| Diabetes Drug Comparison Charts.....                  | 18-20 |
| Weight Loss Pharmacotherapy Chart.....                | 21    |

### INSULIN

|                                                           |       |
|-----------------------------------------------------------|-------|
| Introduction.....                                         | 22    |
| Insulin Pen Devices.....                                  | 23    |
| Insulin Drug Comparison Chart.....                        | 24-25 |
| Insulin Initiation, Titration, and Follow Up in T2DM..... | 26-27 |
| Monitoring: Hypoglycemia and Sick Day Management.....     | 28    |
| PERSPECTIVES ON Hypoglycemia.....                         | 29    |
| 🔗 Selecting a Basal Insulin.....                          | 30    |
| Self Monitoring Blood Glucose.....                        | 31    |

### ADDITIONAL DIABETES TOOLS 🔗

|                                           |       |
|-------------------------------------------|-------|
| Introduction.....                         | 32    |
| 🔗 Shared Decision Making in Diabetes..... | 33-34 |
| 🔗 The Long Story Short: Infographic.....  | 35    |
| 🔗 Physical Activity Prescription.....     | 36    |
| 🔗 SADMANS Sick Day Patient Handout.....   | 37    |

### LANDMARK DIABETES TRIALS

|                                              |       |
|----------------------------------------------|-------|
| Introduction.....                            | 38    |
| Cardiovascular Outcome Landmark Trials.....  | 39    |
| Glycemic Target Landmark Trials.....         | 40    |
| Insulin Landmark Trials.....                 | 41    |
| Modifiable Risk Factors Landmark Trials..... | 42-43 |

🖥️ All references are available online at [www.RxFiles.ca](http://www.RxFiles.ca)

## Other RxFiles Books Available Include:

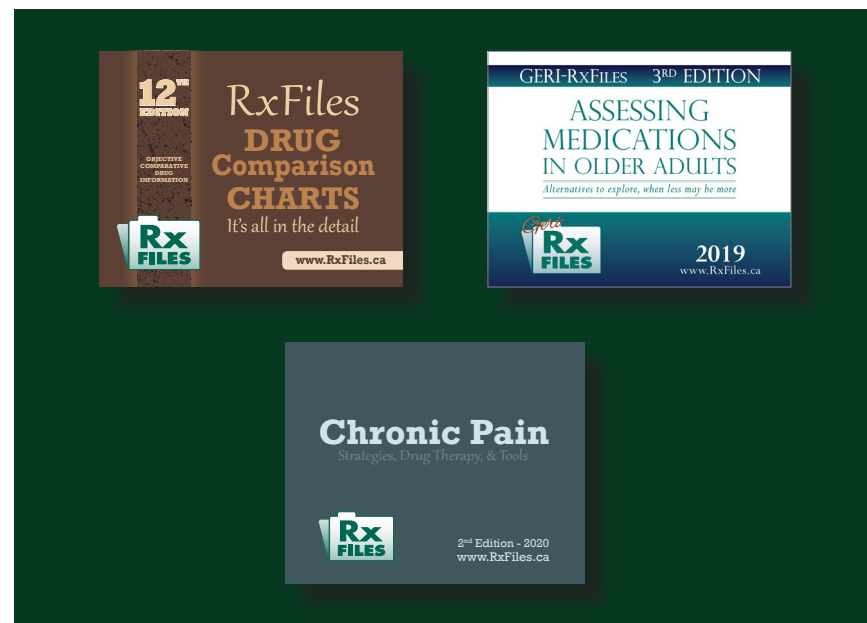

**DISCLAIMER:** The content of this work represents the research, experience, and opinions of the authors and not those of the University of Saskatchewan. Neither the authors nor the University of Saskatchewan nor any other party who has been involved in the preparation or publication of this work warrants or represents that the information contained herein is accurate or complete, and they are not responsible for any errors or omissions or for the result obtained from the use of such information. Any use of the material will imply acknowledgment of this disclaimer and release any responsibility of the University of Saskatchewan, its employees, servants or agents. Readers are encouraged to confirm the information contained herein with other sources. Additional information and references online at [www.RxFiles.ca](http://www.RxFiles.ca).  
Copyright 2020 – RxFiles, University of Saskatchewan [www.RxFiles.ca](http://www.RxFiles.ca)

**Editors & Writers:** Alex Crawley, Marlys LeBras, Taisa Trischuk, Loren Regier, Debbie Bunka, Lynette Kosar, Brent Jensen **Graphic Design:** Debbie Bunka

## References for GLP1 and SGLT2 Subset Colour Chart ([www.RxFiles.ca](http://www.RxFiles.ca))

- Gerstein HC, Colhoun HM, Dagenais GR, et al; REWIND Investigators. Dulaglutide and renal outcomes in type 2 diabetes: an exploratory analysis of the **REWIND** randomised, placebo-controlled trial. *Lancet*. 2019;394:131-138. [https://doi.org/10.1016/S0140-6736\(19\)31150-X](https://doi.org/10.1016/S0140-6736(19)31150-X).
- Husain M, Birkenfeld AL, Donsmark M, et al. For the **PIONEER 6** investigators. Oral semaglutide and cardiovascular outcomes in patients with type 2 diabetes. *N Engl J Med*. June 11, 2019. <https://doi.org/10.1056/NEJMoa1901118>.
- Marso SP, Daniels GH, Brown-Frandens K, et al. Liraglutide and Cardiovascular Outcomes in Type 2 Diabetes. (**LEADER**) *N Engl J Med*. 2016 Jun 13
- Marso SP, Bain SC, Consoi A, et al. Semaglutide and Cardiovascular Outcomes in Patients with Type 2 Diabetes. (**SUSTAIN-6**) *N Engl J Med*. 2016 Nov 10;375(19):1834-1844.
- McMurray JJV, Solomon SD, Inzucchi SE, Køber Let al; **DAPA-HF** Trial Committees and Investigators. Dapagliflozin in Patients with Heart Failure and Reduced Ejection Fraction. *N Engl J Med*. 2019 Sep 19.
- Neal B, Perkovic V, Mahaffey KW, de Zeeuw D, Fulcher G, Erondu N, Shaw W, Law G, Desai M, Matthews DR; **CANVAS** Program Collaborative Group. Canagliflozin and Cardiovascular and Renal Events in Type 2 Diabetes. *N Engl J Med*. 2017 Aug 17;377(7):644-657. doi: 10.1056/NEJMoa1611925. Epub 2017 Jun 12. PubMed PMID:28605608.
- Perkovic V, Jardine MJ, Neal B, Bompoint S; **CREDESCENCE** Trial Investigators. Canagliflozin and Renal Outcomes in Type 2 Diabetes and Nephropathy. *N Engl J Med*. 2019 Apr 14.
- Regier L. SC GLP-1 Agonist Major RCTs, **N American Results**, in RxFiles Q&A, Nov2019. Accessed online 04 Nov 2019 at <https://www.rxfiles.ca/RxFiles/uploads/documents/GLP-1%20RCTs%20-%20Questions%20-%20North%20American%20Results.pdf>
- Wiviott SD, Raz I, Bonaca MP, Mosenzon O, Kato ET, Cahn A, Silverman MG, Zelniker TA, Kuder JF, Murphy SA, Bhatt DL, Leiter LA, McGuire DK, Wilding JPH, Ruff CT, Gause-Nilsson IAM, Fredriksson M, Johansson PA, Langkilde AM, Sabatine MS; **DECLARE-TIMI 58** Investigators. Dapagliflozin and Cardiovascular Outcomes in Type 2 Diabetes. *N Engl J Med*. 2019 Jan 24;380(4):347-357. doi:10.1056/NEJMoa1812389. Epub 2018 Nov 10.
- Zinman B, Wanner C, Lachin JM, Fitchett D, Bluhmki E, Hantel S, Matthews M, Devins T, Johansen OE, Woerle HJ, Broedl UC, Inzucchi SE; **EMPA-REG OUTCOME** Investigators. Empagliflozin, Cardiovascular Outcomes, and Mortality in Type 2 Diabetes. *N Engl J Med*. 2015 Nov 26;373(22):2117-28. doi:10.1056/NEJMoa1504720. Epub 2015 Sep 17. PubMed PMID: 26378978.

## Notes / References for Diabetes Agents Colour Outcomes Comparison Chart ([www.RxFiles.ca](http://www.RxFiles.ca))

### Death/MACE (MACE: Major adverse cardiovascular event)

1. Drug manufacturers must establish CV safety (one-sided upper boundary of 95% CI  $\leq 1.3$ ) vs comparator (typically placebo) in a RCT for all new agents in  $\uparrow$  CV risk patients.<sup>1</sup> **FDA**
2. Metformin vs conventional diet; obese  $>120$  lbW & small sample  $n=753$ ;  $\downarrow$  **all-cause mortality NNT 14/10.7 yr**, and  $\downarrow$  **MI NNT=14/10.7 yr**.<sup>2</sup> **UKPDS-34** 10 yr observational follow-up  $\downarrow$  **all-cause mortality NNT=14/~20 yr**, and  $\downarrow$  **MI NNT=16/~20 yr**.<sup>3</sup> **UKPDS-80**
3. Intensive HbA1c target (included gliclizide) vs standard HbA1c target; MACE 10% vs 10.6%  $p=NS$ , all-cause mortality 8.9% vs 9.6%  $p=NS$ .<sup>4</sup> **ADVANCE**
4. Intensive therapy (chlorpropamide, glipizide<sup>USA</sup>, glibenclamide or insulin) vs conventional diet; all-cause mortality 17.9% vs 18.9%  $p=NS$ , MI 14.7% vs 17.4%  $p=NS$ , and stroke 5.6% vs 5%  $p=NS$ .<sup>5</sup> **UKPDS-33** 10 yr observational follow-up  $\downarrow$  **all-cause mortality NNT=29/~20 yr**, and  $\downarrow$  **MI NNT=36/~20 yr**.<sup>3</sup> **UKPDS-80**
5. SU (2<sup>nd</sup> or 3<sup>rd</sup> generation) vs control (diet, placebo, other antihyperglycemic); all-cause mortality OR 1.12 (0.96-1.3,  $I^2=0\%$ ), CV mortality OR 1.12 (0.87-1.42,  $I^2=12\%$ ), MI OR 0.92 (0.76-1.12,  $I^2=NR$ ), stroke OR 1.16 (0.81-1.66,  $I^2=NR$ ).<sup>6</sup>
6. Metformin vs glipizide; Chinese, small sample  $n=304$ , & medically undertreated 100% CAD, but  $\leq 10\%$  taking ACEi; Metformin  $\downarrow$  **MACE NNT=10/5 yr**.<sup>7</sup> **SPREAD-DIMCAD**
7. Pioglitazone vs placebo; T2DM & high CV risk;  $\downarrow$  **MACE NNT=50/2.9 yr**,<sup>8</sup> **PROACTIVE** insulin resistance & recent TIA/stroke;  $\downarrow$  **MACE NNT=36/4.8 yr**.<sup>9</sup> **IRIS**
8. Rosiglitazone vs placebo;  $\uparrow$  **MACE 2.9%** vs 2.1%  $p=0.08$  (NS), trial stopped 5 mons early,<sup>10</sup> **DREAM**  $\uparrow$  MI **NNH=167** & CV death 0.87% vs 0.39%  $p=0.06$ .<sup>10</sup> Rosiglitazone vs glyburide  $\uparrow$  **MACE NNH 63/4 yr**.<sup>12</sup> **ADOPT**
9. Acarbose vs placebo; impaired glucose tolerance;  $\downarrow$  **MACE NNT 40/3.3 yr**.<sup>13</sup> **STOP-NIDDM** Acarbose vs placebo; coronary heart disease (Chinese) HR 0.98 95% CI, 0.86-1.11,  $p=0.73$ .<sup>13</sup> **ACE**
10. Saxagliptin vs placebo; MACE 7.3% vs 7.2%, **non-inferior** ( $p<0.001$ ), but not superior ( $p=0.99$ ).<sup>14</sup> **SAVOR-TIMI 53** Alogliptin vs placebo; MACE 11.3% vs 11.8%, **non-inferior** ( $p<0.001$ ), but not superior ( $p=0.32$ ).<sup>15</sup> **EXAMINE** Sitagliptin MACE vs placebo; MACE 9.6% vs 9.6%, **non-inferior** ( $p<0.001$ ), but not superior ( $p=0.65$ ).<sup>16</sup> **TECOS** Meta-analysis(**SAVOR-TIMI 53**, **EXAMINE**, **TECOS**) MACE RR 0.99 (95% CI, 0.93-1.06,  $I^2=0\%$ ).<sup>17</sup>
11. Linagliptin vs placebo; MACE 12.4% vs 12.1% **non-inferior** ( $p<0.001$ ), but not superior ( $p=0.74$ ).<sup>18</sup> **CARMELINA** Linagliptin vs glimepiride: MACE 11.8% vs 12% non-inferior ( $p<0.001$ ) but not superior.<sup>19</sup> **CAROLINA2019**
12. Liraglutide vs placebo; **MACE 13%** vs 14.9%, **superior** ( $p=0.01$ , **NNT=53/3.8 yr**), but results neutral in North America subgroup;  $\downarrow$  **CV death NNT=77/3.8 yr** and  $\downarrow$  **all-cause mortality NNT 72/3.8 yr**.<sup>19</sup> **LEADER** Semaglutide SC weekly vs placebo; MACE **superior**; (nephropathy was better; however, retinopathy complications were worse).<sup>20</sup> **SUSTAIN6**

19. Intensive insulin vs standard insulin; **T1DM population**; ~11 yr observational follow up  $\downarrow$  **MACE NNT=23/ ~17 yr**.<sup>32</sup> **DCCT**, <sup>33</sup> **EDIC**
20. Insulin basal/bolus vs conventional diet; all-cause mortality 18.6% vs 19.9%  $p=NS$ , MI 15.8% vs 17.9%

### Death/MACE (MACE: Major adverse cardiovascular event)- cont'd

- $p=NS$ , and stroke 5.4% vs 5.0%  $p=NS$ .<sup>5</sup> **UKPDS-33** 10 yr observational follow-up  $\downarrow$  **all-cause mortality NNT=29/~20 yr**, and  $\downarrow$  **MI NNT=36/~20 yr**.<sup>3</sup> **UKPDS-80**
21. Greater insulin use (any & bolus) with intensive therapy vs standard therapy;  $\uparrow$  **MACE NNT=33/3.5 yr** and  $\uparrow$  **CV death NNT=125/3.5 yr**.<sup>34</sup> **ACCORD**  
Insulin degludec vs insulin glargine (T2DM; ~50/50 split bolus vs bolus/basal baseline & no difference between basal/bolus insulin use between groups at the end of study): MACE 8.5% vs 9.3% (95% CI 0.78- 1.06;  $p<0.001$  non-inferiority).<sup>34a</sup> **DEVOTE**

### Weight (weight gain/loss variable, diabetic agents used in conjunction with diet and lifestyle interventions as well as other concomitant medications)

- A1. Metformin:  $\downarrow$  2.9 kg/4 yr <sup>1</sup> **ADOPT**
- A2. Sulfonylureas:  $\uparrow$  1.6 kg/4 yr <sup>1</sup> **ADOPT**
- A3. Pioglitazone:  $\uparrow$  3.6 kg/3 yr <sup>2</sup> **PROACTIVE**
- A4. Rosiglitazone:  $\uparrow$  4.8 kg/4 yr; rosiglitazone statistically significant  $\uparrow$  weight vs. both metformin & glyburide <sup>1</sup> **ADOPT**
- A5. Acarbose:  $\downarrow$  1.15 kg/3 yr <sup>3</sup> **STOP-NIDDM**
- A6. Repaglinide:  $\uparrow$  ~1.7 kg/12-24 wks;<sup>4,5</sup> nateglinide:  $\uparrow$  0.7-1 kg/16-24 wks<sup>4,6</sup>
- A7. DPP4-inhibitors (generally considered neutral)<sup>7</sup>
  - saxagliptin  $\downarrow$  0.4 kg/2.1 year (similar to placebo) <sup>8</sup> **SAVOR-TIMI 53**
  - alogliptin  $\uparrow$  1 kg/18 months (similar to placebo) <sup>9</sup> **EXAMINE**
  - sitagliptin  $\uparrow$   $\leq$  0.5 kg/12 weeks<sup>10</sup>
- A8. GLP1 agonists
  - exenatide  $\downarrow$  2.8 kg/24-52 weeks<sup>11</sup>
  - liraglutide  $\downarrow$  2.3 kg/3.8 yr <sup>12</sup> **LEADER**
  - dulaglutide  $\downarrow$  1.3-3 kg/5-52 weeks<sup>13</sup>
- A9. SGLT2 inhibitors<sup>14</sup>
  - canagliflozin  $\downarrow$  2.8-4 kg/4-52 weeks<sup>15,16</sup> **CANTATA-M**
  - dapagliflozin  $\downarrow$  2 kg/12-52 weeks<sup>17</sup>

13. Lixisenatide vs placebo (post-ACS); MACE 13.4% vs 13.2%, **non-inferior** ( $p < 0.001$ ), not superior ( $p = 0.81$ ).<sup>21</sup> [ELIXA](#)
14. Exenatide extended release vs placebo (~70% CVD, ~30% primary prevention); MACE 11.4% vs 12.2% over median 3.2 yr, **non-inferior** ( $p < 0.001$ ), but not superior ( $p = 0.06$ ).<sup>22</sup> [EXSCEL](#) Dulaglutide<sup>USA</sup> CV trial ongoing, estimated completed 2018.<sup>23</sup> [REWIND](#) Albiglutide CV trial ongoing, estimated completed 2018.<sup>24</sup> [HARMONY](#) Semaglutide PO CV trial semaglutide po vs placebo: MACE, non-inferior; ↓ all-cause death 1.4% vs 2.8%<sup>25</sup> 2ndy endpoint 2019, [PIONEER-6](#)
15. Empagliflozin vs placebo; **MACE 10.5% vs 12.1%, superior** ( $p = 0.04$ , **NNT=63/3.1 yr**); ↓ **CV death NNT=46/3.1 yr** and ↓ **all-cause mortality NNT 39/3.1 yr**.<sup>25</sup> [EMPA-REG](#) Canagliflozin vs placebo; **MACE 26.9/1000ptys (2.7%/yr) vs 31.5/1000ptys (3.15%/yr), superior** ( $p = 0.02$ , **NNT~220/yr**), f/u duration 3.6yr, no significant difference in components of primary composite or death; ↑ MACE in 1<sup>st</sup> 30 days ( $n = 13$  vs  $n = 1$ ,  $p = NS$ , non-dose related); ↓ MACE (NS) after 30 days (HR 0.89, 95% CI 0.64, 1.25); numeric imbalance not present in non-[CANVAS](#) trials.<sup>26,27,27a</sup> [CANVAS](#) Dapagliflozin vs placebo; MACE 8.8% vs 9.4%  $p < 0.001$  **non-inferior**, but not superior  $p = 0.17$ ; ↓ CV death & HF hospitalization combo outcome.<sup>28</sup> [DECLARE](#)
16. Ertugliflozin CV trial ongoing, estimated completed 2019.<sup>29</sup> [VERTIS CV](#) Sotagliflozin CV trial ongoing, estimated completed 2022. [SCORE](#)
17. Basal insulin (glargine) vs standard care; all-cause mortality 15.2% vs 15.4%  $p = NS$ , MI 5.4% vs 5.2%  $p = NS$ , and stroke 5.3 vs 5.1%  $p = NS$ .<sup>30</sup> [ORIGIN](#)
18. Basal insulin vs basal/bolus insulin; small sample  $n = 152$ ; CV mortality 3.8% vs 6.7%  $p = NS$ , MACE 20% vs 32%  $p = NS$ .<sup>31</sup>

### HF/Edema- cont'd

29. Repaglinide vs rosiglitazone: peripheral edema 0% vs 3.2%,  $p = N/A$ .<sup>9</sup>
30. Saxagliptin vs placebo; ↑ **hospitalization for HF NNH=143/2.1 yr**; however, subgroup without a history of HF at baseline ↑ **hospitalization for HF NNH=147/2.1 yr**, subgroup eGFR <60 mL/min ↑ **hospitalization for HF NNH=68/2.1 yr** & no difference from 12 months on (HR 1.05, 95% CI 0.81-1.35).<sup>10, 11</sup> [SAVOR-TIMI 53](#) Alogliptin vs placebo; hospitalization for HF 3.9% vs 3.3%  $p = 0.22$ ; subgroup without a history of HF at baseline ↑ **hospitalization for HF NNH=111/1.5 yr**.<sup>12,13</sup> [EXAMINE](#) Sitagliptin vs placebo; hospitalization for HF 3.1% vs 3.1%  $p = 0.98$ ; and neutral results when adjusted for baseline HF (aHR 1.00, 95% CI 0.83-1.20 [unpublished data]).<sup>14,15</sup> [TECOS](#) Meta-analysis([SAVOR-TIMI 53](#), [EXAMINE](#), [TECOS](#)) HF admission RR 1.12 (95% CI, 1.00-1.25,  $I^2 = 42\%$ ).<sup>16</sup> FDA warnings for both saxagliptin & alogliptin.<sup>17</sup> Linagliptin vs placebo; hospitalization for heart failure 6.0% vs 6.5% for an absolute incidence rate difference of -0.27 (95% CI, -0.82 to 0.28), with no significant difference between the 2 treatment groups (HR, 0.90; 95% CI, 0.74-1.08;  $P = .26$ ).[CARMELINA](#)
31. Liraglutide vs placebo; hospitalization for HF: 4.7% vs 5.3%  $p = 0.14$ .<sup>18</sup> [LEADER](#) Lixisenatide vs placebo; hospitalization for HF: 4.0% vs 4.2%  $p = 0.75$ .<sup>19</sup> [ELIXA](#)
32. Empagliflozin vs placebo; hospitalization for HF: 2.7% vs 4.1%  $p = 0.002$ .<sup>20</sup> [EMPA-REG](#) Empagliflozin in HF patients (regardless of diabetes status) ongoing trial estimated to be complete 2020 [EMPEROR-Reduced & Preserved](#). Canagliflozin vs placebo; hospitalization for HF: 5.5/1000ptys (0.55%/yr) vs 8.7/1000ptys (0.87%/yr) (HR 0.67, 95% CI 0.52-0.87) follow up 3.6yr but exploratory.<sup>27a</sup> [CANVAS](#) Dapagliflozin vs placebo; hospitalization for HF: 2.5%/1000 patient year vs 3.3%/1000 patient year HR0.73 (95% CI 0.61-0.88) but exploratory.<sup>28</sup> [DECLARE](#) Dapagliflozin 10mg po once daily vs placebo; composite primary outcome: worsening HF (hospitalization or urgent visit resulting in IV therapy for heart failure) or CV death: 16.3% vs 21.2%  $p < 0.001$ . [DAPA-HF](#)
33. Basal insulin (glargine) vs standard care; hospitalization for HF 4.9% vs 5.5%  $p = NS$ .<sup>21</sup> [ORIGIN](#)
34. Basal insulin vs basal/bolus insulin; small sample  $n = 152$ ; HF 1.3% vs 5.3%  $p = NS$ .<sup>22</sup> [ArchInternMed1997](#)

### Other/Additional Trials Recently Published

35. Pioglitazone & Rosiglitazone [FDA +/-](#) Health Canada warnings/label changes:
  - ?↑ HF (see above)<sup>1</sup> [PROACTIVE](#), [2](#) [RECORD](#), [3](#) [DREAM](#), [4](#), [5](#)
  - ?↑ fractures ♀; pioglitazone vs placebo 5.1 vs 2.5%, calculated  $p = 0.005$  ?↑ fractures ♀ **NNH=38/2.9 yr** (unpublished [PROACTIVE](#) data).<sup>6</sup> Rosiglitazone vs MF ↑ fractures ♀ **NNH=24/4 yr**, rosiglitazone vs glyburide ↑ fractures ♀ **NNH=17/4 yr**.<sup>8</sup> [ADOPT](#) Post marketing data: pioglitazone

- empagliflozin ↓ ~1.5-2 kg/3.1 y<sup>18</sup> [EMPA-REG](#)
- A10. Insulin
- intensive therapy vs standard therapy; avg weight ↑ 3.5 kg vs 0.4 kg/3.5 y; weight ↑ >10 kg 28% vs 14%  $p < 0.00$ <sup>19</sup> [ACCORD](#)
  - Note: detemir -1.27 to -0.8 kg vs NPH (glargine no difference vs NPH)<sup>20</sup>

### HF/Edema

22. MF should be considered 1<sup>st</sup> line in HF patients with eGFR > 30 mL/min [Grade D, Consensus].<sup>1</sup> [CDA'13](#)
  23. Retrospective cohort ( $n = 10,920$  patients hospitalized with HF); MF vs SU ↓ **all-cause mortality aHR 0.85 (95% CI 0.75-0.98)**, MF + SU vs MF ↓ **all-cause mortality aHR 0.89 (95% CI 0.82-0.96)**, MF + insulin vs SU neutral aHR0.96 (95% CI 0.82-1.13), MF+SU+insulin neutral aHR 0.94 (0.77-1.15).<sup>2</sup>
  24. Intensive A1C target (included gliclazide) vs standard A1C target; HF (HF death, HF hospitalization, worsening NYHA class) 3.9% vs 4.1%  $p = NS$ .<sup>3</sup> [ADVANCE](#)
  25. Glyburide vs rosiglitazone; ↓ **HF (serious events) NNT 167/3.5 yr**, ↓ **HF (total events) NNT=67/3.5 yr**.<sup>4</sup> [ADOPT](#)
  26. Pioglitazone vs placebo; ↑ **hospitalization for HF NNH=50/2.9 yr** (not adjudicated), ↑ **edema (without HF) NNH=8/2.9 yr**.<sup>5</sup> [PROACTIVE](#)
  27. Rosiglitazone +metformin or SU vs control; ↑ **hospitalization for HF or HF death NNH=69/5.5 yr**.<sup>6</sup> [RECORD](#) Rosiglitazone vs placebo; ↑ **HF NNH=250/3 yr**.<sup>7</sup> [DREAM](#)
  28. Acarbose vs placebo; impaired glucose tolerance; HF 0% vs 0.3%  $p = N/A$ .<sup>8</sup> [STOP-NIDDM](#)
- Other- continued**
- or sitagliptin/metformin of which  $n = 58$  cases were hospitalized ( $n = 4$  cases admitted to the ICU),  $n = 2$  cases of hemorrhagic or necrotizing pancreatitis.<sup>27</sup> Listed adverse event for other agents (e.g., liraglutide) in product monograph.
40. Incretin agents (DPP-4 inhibitors and GLP1 agonists) ?↑ pancreatic cancer:  $n = 13$  pancreatic cancer cases suspected of being associated with all incretin-based therapies (July 31, 2014).<sup>24,28</sup>
  41. Liraglutide: ?↑ thyroid C-cell tumor (including medullary thyroid carcinoma) in animal studies (both genders, dose-dependent, and treatment-duration-dependent).<sup>29</sup>
  42. ?↑/↓ GI (nausea, diarrhea, vomiting) AE with long acting agents<sup>30,31</sup>: ↑ **GI AE: taspoglutide once weekly 59% vs exenatide BID 35%** (clinical development of taspoglutide has been stopped).<sup>32</sup> ↓ **GI AE: Exenatide once weekly 28% vs exenatide BID 48%**, albiglutide once weekly 29.8% vs liraglutide daily 52%, exenatide once weekly 19.1% vs liraglutide daily 44.5%.<sup>33</sup> [DURATION-5,34](#) [HARMONY-7,35](#) [DURATION-6](#) Neutral GI: dulaglutide once weekly 39.4% vs liraglutide daily 38.3%.<sup>36</sup> [AWARD-6](#)
  43. SGLT2 inhibitors [FDA +/-](#) Health Canada warnings/label changes:
    - ?↑ diabetic ketoacidosis;  $n = 5$  Canadian cases, some requiring hospitalization (May 2016);  $n = 73$  US cases ( $n = 44$  T2DM cases,  $n = 15$  T1DM cases,  $n = 13$  NR) (Mar 2013-2015) all requiring hospitalization or emergency department care.<sup>37,38</sup>
    - ?↑ urosepsis & pyelonephritis;  $n = 19$  cases requiring hospitalizations (canagliflozin [ $n = 10$  cases] and dapagliflozin [ $n = 9$  cases]), of which  $n = 4$  cases required ICU admission and  $n = 2$  cases required hemodialysis (Mar 2013-Oct 2014).<sup>38</sup>
    - ?↑ AKI;  $n = 2$  Canadian cases (Canagliflozin) (Oct 2015);  $n = 101$  US cases (Mar 2013-Oct 2015), of which  $n = 96$  cases required hospitalization ( $n = 22$  cases required ICU admission),  $n = 15$  cases required hemodialysis, and  $n = 4$  cases resulted in death. ~50% of cases occurred within 1 month of drug initiation; empagliflozin not included in review due to recent approval.<sup>39,40</sup>
    - ?↑ fracture; canagliflozin 100 mg-300 mg vs placebo follow up 3.6yr; 15.4/1000ptys (1.54%/yr) vs 11.9/1000ptys (1.19%/yr) **NNT= 285/yr** (HR 1.26, 95% CI 1.04-1.52).<sup>41</sup> [CANVAS](#) ?↓ BMD (total hips, lumbar spine, femoral neck, & distal forearm).<sup>41</sup>
    - ?↑ lower limb amputation; canagliflozin 100-300 mg vs placebo follow up 3.6yr; ↑ all amputation 6.3/1000ptys (.63%/yr) vs 3.4/1000ptys (0.34%/yr) **NNH=345/yr** (HR 1.97, 95% CI 1.41-2.75) & ↑ major amputation (ankle, below/above knee) 1.8/1000ptys (0.18%/yr) vs 0.9/1000ptys (0.09%/yr) **NNH>1000/yr** (HR 2, 95% CI 1.08-3.82). [CANVAS](#) Other trials neutral. e.g., [CANVAS-R](#)<sup>42,43</sup> May2017 [FDA](#): canagliflozin -increased risk of leg and foot amputations. [https://www.fda.gov/Drugs/DrugSafety/ucm557507.htm?source=govdelivery&utm\\_medium=email&utm\\_source=govdelivery](https://www.fda.gov/Drugs/DrugSafety/ucm557507.htm?source=govdelivery&utm_medium=email&utm_source=govdelivery)

- exposure in women associated **0.8 excess fractures (distal upper and lower limbs)/100 patient-years** vs comparator treated group.<sup>8</sup> No ↑ risk in males.<sup>8,9</sup>
- ?↑ diabetic macular edema: retrospective cohort, TZD users vs nonusers ↑ macular edema 1 yr follow up aOR 2.3 (1.5-3.6) & 10 yr follow up HR 2.3 (1.7-3.0).<sup>10</sup> Cross-section of **ACCORD** ↑ macular edema aOR, 0.97 (0.67-1.40).<sup>11</sup> Note- only rosiglitazone has a warning.<sup>12</sup>
36. Piog: ?↑ bladder cancer; France, retrospective observational cohort pioglitazone exposure vs other diabetic agent HR 1.22 (1.03-1.43), pioglitazone exposure **cumulative dose > 28 000 mg** vs other diabetic agent HR 1.75 (1.22-2.5), pioglitazone **exposure >12 months** vs other diabetic agent HR 1.28 (1.09-1.51).<sup>13</sup> US, prospective observational cohort (5 yr interim analysis) pioglitazone exposure vs never exposed HR 1.2 (0.9-1.5), pioglitazone exposure >12 months vs never exposed HR 1.4 (0.9-2.1), & pioglitazone exposure >24 months vs never exposed HR 1.4 (1.03-2.0).<sup>14</sup> FDA calculated pioglitazone >12 months associated **27.5 excess cases of bladder cancer /100,000 person-yrs** vs never exposed.<sup>15,16</sup>
37. Rosiglitazone **FDA +/-** Health Canada warnings/label changes: restricted access- in Canada (SK-EDS) due to ?↑ CV events- see MACE/mortality.<sup>17-21</sup>
38. DPP-4 inhibitors FDA +/- Health Canada warnings/label changes:
- ?↑ HF risk with saxagliptin and alogliptin (see above).<sup>10, 11</sup> **SAVOR-TIMI 53**,<sup>12,13</sup> **EXAMINE**,<sup>16, 22</sup>
  - ?↑ arthralgia risk; n=33 cases of severe arthralgia, of which n=10 cases were hospitalized due to disabling joint pain; n=8 cases reported a positive rechallenge (2006-2013).<sup>23</sup>
39. Incretin agents (DPP-4 inhibitors and GLP1 agonists) ?↑ pancreatitis:<sup>24</sup> Meta-analysis of **SAVOR-TIMI 53**, **EXAMINE**, & **TECOS** (n=36,395) demonstrated ↑ acute pancreatitis **OR 1.79 (1.13-2.82)** and **ARI of 0.13%** vs placebo.<sup>24a</sup> US case control study; incretin agent (exenatide or sitagliptin) within 30 days **OR 2.24 (95% CI, 1.36-3.68)**.<sup>25</sup> FDA: n=30 cases of pancreatitis with exenatide of which n=21 cases hospitalized, n=3 cases reported positive rechallenge.<sup>26</sup> FDA: n=88 cases of pancreatitis with sitagliptin
44. ?↑ UTI; SGLT2 inhibitor vs placebo: **OR 1.34 (1.03-1.74, I<sup>2</sup>=0%)**, vs active agent: OR 1.42 (1.06-1.9, I<sup>2</sup>=25%); however recent real world surveillance data suggests this may not be an issue <sup>47, 48</sup> <https://annals.org/aim/article-abstract/2739786/sodium-glucose-cotransporter-2-inhibitors-risk-severe-urinary-tract-infections?searchresult=1> .
- ↑ **genital tract skin infection**; SGLT2 inhibitor vs placebo **OR 3.50 (2.46-4.99, I<sup>2</sup>=0%)**, vs active agent: OR 5.06 (3.44-7.45, I<sup>2</sup>=0%).<sup>44</sup>
45. Dapagliflozin: ? ↑ bladder/breast cancer; approved by FDA 2014 (rejected in 2012 due to breast & bladder cancer concerns). Dapagliflozin vs control; bladder cancer: n=10 cases vs n=1 case & breast cancer: n=12 cases vs n= 3 cases (up to 2013).
46. Canagliflozin 100mg once daily vs placebo: ↓ primary composite outcome of ESKD, doubling of SCr & renal or CV death: 11.1% vs 15.5% p= 0.00001. **CREDESCENCE**
47. FDA Warning (May 2019): SGLT2 inhibitors associated with **Fournier Gangrene**. 55 cases reported to FDA between 2013-19 with SGLT2i. Likely class effect (cana = 21, dapa = 16, empa=18). 2019 review: <https://annals.org/aim/article-abstract/2732837/fournier-gangrene-associated-sodium-glucose-cotransporter-2-inhibitors-review-spontaneous>

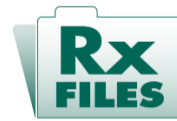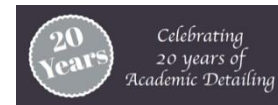

RxFiles Academic Detailing  
Bringing evidence to practice!

[www.RxFiles.ca](http://www.RxFiles.ca)

#### References: Death/MACE

1. U.S. Department of Health and Human Services Food and Drug Administration Center for Drug Evaluation and Research. Guidance for industry: diabetes mellitus—evaluating cardiovascular risk in new antidiabetic therapies to treat type 2 diabetes. [www.fda.gov/downloads/drugs/guidanceregulatoryinformation/guidances/ucm071627.pdf](http://www.fda.gov/downloads/drugs/guidanceregulatoryinformation/guidances/ucm071627.pdf) (accessed July 12 2016).
2. Effect of intensive blood-glucose control with metformin on complications in overweight patients with type 2 diabetes (UKPDS 34). UK Prospective Diabetes Study (UKPDS) Group. *Lancet*. 1998 Sep 12;352(9131):854-65.
3. Holman RR, Paul SK, Bethel MA, Matthews DR, Neil HA. 10-year follow-up of intensive glucose control in type 2 diabetes. *N Engl J Med*. 2008 Oct 9;359(15):1577-89.
4. ADVANCE Collaborative Group, Patel A, MacMahon S, Chalmers J, Neal B, Billot L, Woodward M, Marre M, Cooper M, Glasziou P, Grobbee D, Hamet P, Harrap S, Heller S, Liu L, Mancia G, Mogensen CE, Pan C, Poulter N, Rodgers A, Williams B, Bompoint S, de Galan BE, Joshi R, Travert F. Intensive blood glucose control and vascular outcomes in patients with type 2 diabetes. *N Engl J Med*. 2008 Jun 12;358(24):2560-72.
5. Intensive blood-glucose control with sulphonylureas or insulin compared with conventional treatment and risk of complications in patients with type 2 diabetes (UKPDS 33). UK Prospective Diabetes Study (UKPDS) Group. *Lancet*. 1998 Sep 12;352(9131):837-53.
6. Varvaki Rados D, Catani Pinto L, Reck Remonti L, Bauermann Leitão C, Gross JL. The Association between Sulfonylurea Use and All-Cause and Cardiovascular Mortality: A Meta-Analysis with Trial Sequential Analysis of Randomized Clinical Trials. *PLoS Med*. 2016 Apr 12;13(4):e1001992.
7. Hong J, Zhang Y, Lai S, Lv A, Su Q, Dong Y, Zhou Z, Tang W, Zhao J, Cui L, Zou D, Wang D, Li H, Liu C, Wu G, Shen J, Zhu D, Wang W, Shen W, Ning G; SPREAD-DIMCAD Investigators. Effects of metformin versus glipizide on cardiovascular outcomes in patients with type 2 diabetes and coronary artery disease. *Diabetes Care*. 2013 May;36(5):1304-11.
8. Dormandy JA, Charbonnel B, Eckland DJ, Erdmann E, Massi-Benedetti M, Moules IK, Skene AM, Tan MH, Lefebvre PJ, Murray GD, Standl E, Wilcox RG, Wilhelmsen L, Betteridge J, Birkeland K, Golay A, Heine RJ, Korányi L, Laakso M, Mokán M, Norkus A, Pirags V, Podar T, Scheen A, Scherbaum W, Scherthauer G, Schmitz O, Skrha J, Smith U, Taton J; PROactive Investigators. Secondary prevention of macrovascular events in patients with type 2 diabetes in the PROactive Study (PROspective pioglitazone Clinical Trial in macroVascular Events): a randomized controlled trial. *Lancet*. 2005 Oct 8;366(9493):1279-89.
9. Kernan WN, Viscoli CM, Furie KL, Young LH, Inzucchi SE, Gorman M, Guarino PD, Lovejoy AM, Peduzzi PN, Conwit R, Brass LM, Schwartz GG, Adams HP Jr, Berger L Carolei A, Clark W, Coull B, Ford GA, Kleindorfer D, O'Leary JR, Parsons MW, Ringleb P, Sen S, Spence JD, Tanne D, Wang D, Winder TR; IRIS Trial Investigators. Pioglitazone after Ischemic Stroke or Transient Ischemic Attack. *N Engl J Med*. 2016 Apr 7;374(14):1321-31.
10. DREAM (Diabetes REDuction Assessment with ramipril and rosiglitazone Medication) Trial Investigators, Gerstein HC, Yusuf S, Bosch J, Pogue J, Sheridan P, Dinccag N, Hanefeld M, Hoogwerf B, Laakso M, Mohan V, Shaw J, Zinman B, Holman RR. Effect of rosiglitazone on the frequency of diabetes in patients with impaired glucose tolerance or impaired fasting glucose: a randomised controlled trial. *Lancet*. 2006 Sep 23;368(9541):1096-105.
11. Nissen SE, Wolski K. Effect of rosiglitazone on the risk of myocardial infarction and death from cardiovascular causes. *N Engl J Med*. 2007 Jun 14;356(24):2457-71. Epub 2007 May 21.
12. Viberti G, Kahn SE, Greene DA, Herman WH, Zinman B, Holman RR, Haffner SM, Levy D, Lachin JM, Berry RA, Heise MA, Jones NP, Freed MI. A diabetes outcome progression trial (ADOPT): an international multicenter study of the comparative efficacy of rosiglitazone, glyburide, and metformin in recently diagnosed type 2 diabetes. *Diabetes Care*. 2002 Oct;25(10):1737-43.
13. Chiasson JL, Gomis R, Hanefeld M, Josse RG, Karasik A, Laakso M. The STOP-NIDDM Trial: an international study on the efficacy of an alpha-glucosidase inhibitor to prevent type 2 diabetes in a population with impaired glucose tolerance: rationale, design, and preliminary screening data. Study to Prevent Non-Insulin-Dependent Diabetes Mellitus. *Diabetes Care*. 1998 Oct;21(10):1720-5.
14. Scirica BM, Bhatt DL, Braunwald E, Steg PG, Davidson J, Hirshberg B, Ohman P, Frederich R, Wiviott SD, Hoffman EB, Cavender MA, Udell JA, Desai NR, Mosenzon O, McGuire DK, Ray KK, Leiter LA, Raz I; SAVOR-TIMI 53 Steering Committee and Investigators. Saxagliptin and cardiovascular outcomes in patients with type 2 diabetes mellitus. *N Engl J Med*. 2013 Oct 3;369(14):1317-26.
15. White WB, Cannon CP, Heller SR, Nissen SE, Bergenstal RM, Bakris GL, Perez AT, Fleck PR, Mehta CR, Kupfer S, Wilson C, Cushman WC, Zannad F; EXAMINE Investigators. Alogliptin after acute coronary syndrome in patients with type 2 diabetes. *N Engl J Med*. 2013 Oct 3;369(14):1327-35.
16. Green JB, Bethel MA, Armstrong PW, Buse JB, Engel SS, Garg J, Josse R, Kaufman KD, Koglin J, Korn S, Lachin JM, McGuire DK, Pencina MJ, Standl E, Stein PP, Suryawanshi S, Van de Werf F, Peterson ED, Holman RR; TECOS Study Group. Effect of Sitagliptin on Cardiovascular Outcomes in Type 2 Diabetes. *N Engl J Med*. 2015 Jul 16;373(3):232-42.
17. Barry AR, Turgeon RD. DPP-4 Inhibitors: The Seinfeld of Oral Antihyperglycemics. *Can J Hosp Pharm*. 2016 May-Jun;69(3):253-4.

18. Cardiovascular and Renal Microvascular Outcome study with Linagliptin in patients with Type 2 Diabetes Mellitus (CARMELINA). NCT01897532. Available: <https://clinicaltrials.gov/ct2/show/NCT01897532>. (Accessed July 16 2016).
19. Marso SP, Daniels GH, Brown-Frandsen K, Kristensen P, Mann JF, Nauck MA, Nissen SE, Pocock S, Poulter NR, Ravn LS, Steinberg WM, Stockner M, Zinman B, Bergenstal RM, Buse JB; LEADER Steering Committee on behalf of the LEADER Trial Investigators. Liraglutide and Cardiovascular Outcomes in Type 2 Diabetes. *N Engl J Med*. 2016 Jun 13.
20. Nainggolan L. Now Novo Says Semaglutide Cuts CV Risk: SUSTAIN-6 Top-line Data. <http://www.medscape.com/viewarticle/862644> (accessed June 24, 2016).
21. Pfeffer MA, Claggett B, Diaz R, Dickstein K, Gerstein HC, Køber LV, Lawson FC, Ping L, Wei X, Lewis EF, Maggioni AP, McMurray JJ, Probstfield JL, Riddle MC, Solomon SD, Tardif JC; ELIXA Investigators. Lixisenatide in Patients with Type 2 Diabetes and Acute Coronary Syndrome. *N Engl J Med*. 2015 Dec 3;373(23):2247-57.
22. Holman RR, Bethel MA, Mentz RJ, et al. Effects of Once-Weekly Exenatide on Cardiovascular Outcomes in Type 2 Diabetes. *N Engl J Med*. 2017 Sep 14. doi: 10.1056/NEJMoa1612917. {Exenatide Study of Cardiovascular Event Lowering Trial (EXSCEL): A Trial To Evaluate Cardiovascular Outcomes After Treatment With Exenatide Once Weekly In Patients With Type 2 Diabetes Mellitus. NCT01144338. Available: <https://clinicaltrials.gov/ct2/show/NCT01144338?term=EXSCEL&rank=1> (accessed July 21, 2016). }
23. Researching Cardiovascular Events With a Weekly Incretin in Diabetes (REWIND). NCT01394952. Available: <https://clinicaltrials.gov/ct2/show/NCT01394952?term=REWIND&rank=1> (accessed July 21, 2016).
24. Effect of Albiglutide, When added to Standard Blood Glucose Lowering Therapies, on Major Cardiovascular Events in Subjects With Type 2 Diabetes Mellitus. NCT02465515. Available: <https://clinicaltrials.gov/ct2/show/NCT02465515?term=HARMONY+and+albiglutide&rank=1> (accessed July 21, 2016).
25. Zinman B, Wanner C, Lachin JM, Fitchett D, Bluhmki E, Hantel S, Mattheus M, Devins T, Johansen OE, Woerle HJ, Broedl UC, Inzucchi SE; EMPA-REG OUTCOME Investigators. Empagliflozin, Cardiovascular Outcomes, and Mortality in Type 2 Diabetes. *N Engl J Med*. 2015 Nov 26;373(22):2117-28.
26. CANVAS- CANagliflozin cardiovascular Assessment Study. NCT01032629. Available: <https://clinicaltrials.gov/ct2/show/NCT01032629?term=Canvas&rank=1> (accessed July 21 2016).
27. Center for Drug Evaluation and Research. Canagliflozin: Summary Review Available: [http://www.accessdata.fda.gov/drugsatfda\\_docs/nda/2013/204042Orig1s000SumR.pdf](http://www.accessdata.fda.gov/drugsatfda_docs/nda/2013/204042Orig1s000SumR.pdf) (accessed July 21 2016).
- 27a. Neal B, Perkovic V, Mahaffey KW, de Zeeuw D, et al. CANVAS Program Collaborative Group. Canagliflozin and Cardiovascular and Renal Events in Type 2 Diabetes. *N Engl J Med*. 2017 Jun 12.
28. Multicenter Trial to Evaluate the Effect of Dapagliflozin on the Incidence of Cardiovascular Events (DECLARE-TIMI58). NCT01730534. Available: <https://clinicaltrials.gov/ct2/show/NCT01730534?term=DECLARE+and+dapagliflozin&rank=1> (accessed July 21, 2016). Wiviott SD, Raz L, Bonaca MP, et al; DECLARE-TIMI 58 Investigators. Dapagliflozin and Cardiovascular Outcomes in Type 2 Diabetes. *N Engl J Med*. 2018 Nov 10.
29. Cardiovascular Outcomes Following Ertugliflozin Treatment in Type 2 Diabetes Mellitus Participants with Vascular Disease, The VERTIS CV Study (MK-8835-004). NCT01986881. Available: <https://clinicaltrials.gov/ct2/show/NCT01986881?term=Ertugliflozin+and+cardiovascular&rank=1> (accessed July 21 2016).
30. ORIGIN Trial Investigators, Gerstein HC, Bosch J, Dagenais GR, Díaz R, Jung H, Maggioni AP, Pogue J, Probstfield J, Ramachandran A, Riddle MC, Rydén LE, Yusuf S. Basal insulin and cardiovascular and other outcomes in dysglycemia. *N Engl J Med*. 2012 Jul 26;367(4):319-28.
31. Abraira C, Colwell J, Nuttall F, Sawin CT, Henderson W, Comstock JP, Emanuele NV, Paolod I, Lee HS. Cardiovascular events and correlates in the Veterans Affairs Diabetes Feasibility Trial. Veterans Affairs Cooperative Study on Glycemic Control and Complications in Type II Diabetes. *Arch Intern Med*. 1997 Jan 27;157(2):181-8.
32. DCCT Research Group. The effect of intensive treatment of diabetes on the development and progression of long-term complications in insulin-dependent diabetes mellitus. The Diabetes Control and Complications Trial Research Group. *N Engl J Med* 1993; 329: 977- 86.
33. Epidemiology of Diabetes Interventions and Complications (EDIC). Design, implementation, and preliminary results of a long-term follow-up of the Diabetes Control and Complications Trial cohort. *Diabetes Care*. 1999 Jan;22(1):99-111.
34. Action to Control Cardiovascular Risk in Diabetes Study Group, Gerstein HC, Miller ME, Byington RP, Goff DC Jr, Bigger JT, Buse JB, Cushman WC, Genuth S, Ismail-Beigi F, Grimm RH Jr, Probstfield JL, Simons-Morton DG, Friedewald WT. Effects of intensive glucose lowering in type 2 diabetes. *N Engl J Med*. 2008 Jun 12;358(24):2545-59.
- 34a. Marso SP, McGuire DK, Zinman B, et al. DEVOTE Study Group. Efficacy and Safety of Degludec versus Glargine in Type 2 Diabetes. *N Engl J Med*. 2017 Jun 12.
35. Rodríguez-Gutiérrez R, Montori VM. Glycemic Control for Patients With Type 2 Diabetes Mellitus: Our Evolving Faith in the Face of Evidence. *Circ Cardiovasc Qual Outcomes*. 2016 Sep;9(5):504-12.

**References: Weight**

1. Viberti G, Kahn SE, Greene DA, Herman WH, Zinman B, Holman RR, Haffner SM, Levy D, Lachin JM, Berry RA, Heise MA, Jones NP, Freed MI. A diabetes outcome progression trial (ADOPT): an international multicenter study of the comparative efficacy of rosiglitazone, glyburide, and metformin in recently diagnosed type 2 diabetes. *Diabetes Care*. 2002 Oct;25(10):1737-43.
  2. Dormandy JA, Charbonnel B, Eckland DJ, Erdmann E, Massi-Benedetti M, Moules IK, Skene AM, Tan MH, Lefèbvre PJ, Murray GD, Standl E, Wilcox RG, Wilhelmsen L, Betteridge J, Birkeland K, Golay A, Heine RJ, Korányi L, Laakso M, Mokán M, Norkus A, Pirags V, Podar T, Scheen A, Scherbaum W, Scherthaner G, Schmitz O, Skrha J, Smith U, Taton J; PROactive Investigators. Secondary prevention of macrovascular events in patients with type 2 diabetes in the PROactive Study (PROspective pioglitAzone Clinical Trial In macroVascular Events): a randomized controlled trial. *Lancet*. 2005 Oct 8;366(9493):1279-89.
  3. Chiasson JL, Gomis R, Hanefeld M, Josse RG, Karasik A, Laakso M. The STOP-NIDDM Trial: an international study on the efficacy of an alpha-glucosidase inhibitor to prevent type 2 diabetes in a population with impaired glucose tolerance: rationale, design, and preliminary screening data. Study to Prevent Non-Insulin-Dependent Diabetes Mellitus. *Diabetes Care*. 1998 Oct;21(10):1720-5.
  4. Rosenstock J, Hassman DR, Madder RD, Brazinsky SA, Farrell J, Khutoryansky N, Hale PM; Repaglinide Versus Nateglinide Comparison Study Group. Repaglinide versus nateglinide monotherapy: a randomized, multicenter study. *Diabetes Care*. 2004 Jun;27(6):1265-70.
  5. GlucoNorm® (repaglinide tablets) Product Monograph. Novo Nordisk Canada Inc. ON, Canada. June 3, 2015
  6. Starlix® (nateglinide tablets) Product Monograph. Novartis Pharmaceuticals Canada Inc. QB, Canada. June 10, 2011
- 
6. Richard KR, Shelburne JS, Kirk JK. Tolerability of dipeptidyl peptidase-4 inhibitors: a review. *Clin Ther*. 2011 Nov;33(11):1609-29. doi:10.1016/j.clinthera.2011.09.028. Epub 2011 Nov 8.
  7. Canadian Diabetes Association 2013 Clinical. Practice *Guidelines* for the Prevention and Management of Diabetes in Canada. *Can J Diabetes* 2013;37(suppl 1), pg S126-8.
  8. Scirica BM, Bhatt DL, Braunwald E, Steg PG, Davidson J, Hirshberg B, Ohman P, Frederich R, Wiviott SD, Hoffman EB, Cavender MA, Udell JA, Desai NR, Mosenson O, McGuire DK, Ray KK, Leiter LA, Raz I; SAVOR-TIMI 53 Steering Committee and Investigators. Saxagliptin and cardiovascular outcomes in patients with type 2 diabetes mellitus. *N Engl J Med*. 2013 Oct 3;369(14):1317-26.
  9. White WB, Cannon CP, Heller SR, Nissen SE, Bergenstal RM, Bakris GL, Perez AT, Fleck PR, Mehta CR, Kupfer S, Wilson C, Cushman WC, Zannad F; EXAMINE Investigators. Alogliptin after acute coronary syndrome in patients with type 2 diabetes. *N Engl J Med*. 2013 Oct 3;369(14):1327-35.
  10. Scott R, Wu M, Sanchez M, Stein P. Efficacy and tolerability of the dipeptidyl peptidase-4 inhibitor sitagliptin as monotherapy over 12 weeks in patients with type 2 diabetes. *Int J Clin Pract*. 2007 Jan;61(1):171-80.
  11. Vilsbøll T, Christensen M, Junker AE, Knop FK, Gluud LL. Effects of glucagon-like peptide-1 receptor agonists on weight loss: systematic review and meta-analyses of randomised controlled trials. *BMJ*. 2012 Jan 10;344:d7771. doi:10.1136/bmj.d7771.
  12. Marso SP, Daniels GH, Brown-Frandsen K, Kristensen P, Mann JF, Nauck MA, Nissen SE, Pocock S, Poulter NR, Ravn LS, Steinberg WM, Stockner M, Zinman B, Bergenstal RM, Buse JB; LEADER Steering Committee on behalf of the LEADER Trial Investigators. Liraglutide and Cardiovascular Outcomes in Type 2 Diabetes. *N Engl J Med*. 2016 Jun 13.
  13. Edwards KL, Minze MG. Dulaglutide: an evidence-based review of its potential in the treatment of type 2 diabetes. *Core Evid*. 2015 Jan 9;10:11-21.
  14. Scheen AJ. SGLT2 Inhibitors: Benefit/Risk Balance. *Curr Diab Rep*. 2016 Oct;16(10):92.
  15. Yang XP, Lai D, Zhong XY, Shen HP, Huang YL. Efficacy and safety of canagliflozin in subjects with type 2 diabetes: systematic review and meta-analysis. *Eur J Clin Pharmacol*. 2014 Oct;70(10):1149-58.
  16. Stenlöf K, Cefalu WT, Kim KA, Jodar E, Alba M, Edwards R, Tong C, Canovatchel W, Meining G. Long-term efficacy and safety of canagliflozin monotherapy in patients with type 2 diabetes inadequately controlled with diet and exercise: findings from the 52-week CANTATA-M study. *Curr Med Res Opin*. 2014 Feb;30(2):163-75.
  17. Vasilakou D, Karagiannis T, Athanasiadou E, et al. Sodium-glucose cotransporter 2 inhibitors for type 2 diabetes: a systematic review and meta-analysis. *Ann Intern Med*. 2013;159:262-74.
  18. Zinman B, Wanner C, Lachin JM, Fitchett D, Bluhmki E, Hantel S, Mattheus M, Devins T, Johansen OE, Woerle HJ, Broedl UC, Inzucchi SE; EMPA-REG OUTCOME Investigators. Empagliflozin, Cardiovascular Outcomes, and Mortality in Type 2 Diabetes. *N Engl J Med*. 2015 Nov 26;373(22):2117-28.
  19. Action to Control Cardiovascular Risk in Diabetes Study Group, Gerstein HC, Miller ME, Byington RP, Goff DC Jr, Bigger JT, Buse JB, Cushman WC, Genuth S, Ismail-Beigi F, Grimm RH Jr, Probstfield JL, Simons-Morton DG, Friedewald WT. Effects of intensive glucose lowering in type 2 diabetes. *N Engl J Med*. 2008 Jun 12;358(24):2545-59.
  20. Canadian Optimal Medication Prescribing & Utilization Service (COMPUS), 2008; Current Topics, Diabetes: <http://cadth.ca/index.php/en/compus/current-topics/-dm1> ([www.cadth.ca](http://www.cadth.ca)) {Long-acting IAs: Metaanalysis of Clinical Outcomes: [http://cadth.ca/media/compus/reports/compus\\_Long-Acting-Insulin-Analogs-Report\\_Clinical-Outcomes.pdf](http://cadth.ca/media/compus/reports/compus_Long-Acting-Insulin-Analogs-Report_Clinical-Outcomes.pdf) }

{Rapid Acting IAs: Metaanalysis of Clinical Outcomes: [http://cadth.ca/media/compus/reports/compus\\_Rapid-Acting-Insulin-Analogues-Report\\_Clinical=Outcomes.pdf](http://cadth.ca/media/compus/reports/compus_Rapid-Acting-Insulin-Analogues-Report_Clinical=Outcomes.pdf) }

{Optimal Therapy Recommendations for Prescribing and Use of Insulin Analogues: [http://cadth.ca/media/pdf/compus\\_IA\\_OT\\_rec\\_report.pdf](http://cadth.ca/media/pdf/compus_IA_OT_rec_report.pdf) Final Report: January 2009}

{Grade Evidence Profiles of Long and Rapid Acting Insulin Analogues: [http://cadth.ca/media/compus/reports/compus\\_GRADE-REPORT.pdf](http://cadth.ca/media/compus/reports/compus_GRADE-REPORT.pdf) }

## References: HF/Edema

1. Canadian Diabetes Association 2013 Clinical. Practice *Guidelines* for the Prevention and Management of Diabetes in Canada. Can J *Diabetes* 2013;37(suppl 1), pg S126-8.
2. Andersson C, Olesen JB, Hansen PR, Weeke P, Norgaard ML, Jørgensen CH, Lange T, Abildstrøm SZ, Schramm TK, Vaag A, Køber L, Torp-Pedersen C, Gislason GH. Metformin treatment is associated with a low risk of mortality in diabetic patients with heart failure: a retrospective nationwide cohort study. *Diabetologia*. 2010 Dec;53(12):2546-53.
3. ADVANCE Collaborative Group, Patel A, MacMahon S, Chalmers J, Neal B, Billot L, Woodward M, Marre M, Cooper M, Glasziou P, Grobbee D, Hamet P, Harrap S, Heller S, Liu L, Mancia G, Mogensen CE, Pan C, Poulter N, Rodgers A, Williams B, Bompoint S, de Galan BE, Joshi R, Travert F. Intensive blood glucose control and vascular outcomes in patients with type 2 diabetes. *N Engl J Med*. 2008 Jun 12;358(24):2560-72.
4. Viberti G, Kahn SE, Greene DA, Herman WH, Zinman B, Holman RR, Haffner SM, Levy D, Lachin JM, Berry RA, Heise MA, Jones NP, Freed MI. A diabetes outcome progression trial (ADOPT): an international multicenter study of the comparative efficacy of rosiglitazone, glyburide, and metformin in recently diagnosed type 2 diabetes. *Diabetes Care*. 2002 Oct;25(10):1737-43.
5. Dormandy JA, Charbonnel B, Eckland DJ, Erdmann E, Massi-Benedetti M, Moules IK, Skene AM, Tan MH, Lefèbvre PJ, Murray GD, Standl E, Wilcox RG, Wilhelmsen L, Betteridge J, Birkeland K, Golay A, Heine RJ, Korányi L, Laakso M, Mokán M, Norkus A, Pirags V, Podar T, Scheen A, Scherbaum W, Scherthaner G, Schmitz O, Skrha J, Smith U, Taton J; PROactive Investigators. Secondary prevention of macrovascular events in patients with type 2 diabetes in the PROactive Study (PROspective pioglitAzone Clinical Trial In macroVascular Events): a randomized controlled trial. *Lancet*. 2005 Oct 8;366(9493):1279-89.
6. Home PD, Pocock SJ, Beck-Nielsen H, Curtis PS, Gomis R, Hanefeld M, Jones NP, Komajda M, McMurray JJ; RECORD Study Team. Rosiglitazone evaluated for cardiovascular outcomes in oral agent combination therapy for type 2 diabetes(RECORD): a multicentre, randomised, open-label trial. *Lancet*. 2009 Jun 20;373(9681):2125-35.
7. DREAM (Diabetes REDuction Assessment with ramipril and rosiglitazone Medication) Trial Investigators, Gerstein HC, Yusuf S, Bosch J, Pogue J, Sheridan P, Dinccag N, Hanefeld M, Hoogwerf B, Laakso M, Mohan V, Shaw J, Zinman B, Holman RR. Effect of rosiglitazone on the frequency of diabetes in patients with impaired glucose tolerance or impaired fasting glucose: a randomised controlled trial. *Lancet*. 2006 Sep 23;368(9541):1096-105.
8. Chiasson JL, Gomis R, Hanefeld M, Josse RG, Karasik A, Laakso M. The STOP-NIDDM Trial: an international study on the efficacy of an alpha-glucosidase inhibitor to prevent type 2 diabetes in a population with impaired glucose tolerance: rationale, design, and preliminary screening data. *Study to Prevent Non-Insulin-Dependent Diabetes Mellitus*. *Diabetes Care*. 1998 Oct;21(10):1720-5.
9. GlucoNorm® (repaglinide tablets) Product Monograph. Novo Nordisk Canada Inc. ON, Canada. June 3, 2015
10. Scirica BM, Bhatt DL, Braunwald E, Steg PG, Davidson J, Hirshberg B, Ohman P, Frederich R, Wiviott SD, Hoffman EB, Cavender MA, Udell JA, Desai NR, Mosenzon O, McGuire DK, Ray KK, Leiter LA, Raz I; SAVOR-TIMI 53 Steering Committee and Investigators. Saxagliptin and cardiovascular outcomes in patients with type 2 diabetes mellitus. *N Engl J Med*. 2013 Oct 3;369(14):1317-26.
11. Scirica BM, Braunwald E, Raz I, Cavender MA, Morrow DA, Jarolim P, Udell JA, Mosenzon O, Im K, Umez-Eronini AA, Pollack PS, Hirshberg B, Frederich R, Lewis BS, McGuire DK, Davidson J, Steg PG, Bhatt DL; SAVOR-TIMI 53 Steering Committee and Investigators. Heart Failure, Saxagliptin, and Diabetes Mellitus: Observations from the SAVOR-TIMI 53 Randomized Trial. *Circulation*. 2015 Oct 13;132(15):e198.
12. White WB, Cannon CP, Heller SR, Nissen SE, Bergenstal RM, Bakris GL, Perez AT, Fleck PR, Mehta CR, Kupfer S, Wilson C, Cushman WC, Zannad F; EXAMINE Investigators. Alogliptin after acute coronary syndrome in patients with type 2 diabetes. *N Engl J Med*. 2013 Oct 3;369(14):1327-35.
13. Zannad F, Cannon CP, Cushman WC, Bakris GL, Menon V, Perez AT, Fleck PR, Mehta CR, Kupfer S, Wilson C, Lam H, White WB; EXAMINE Investigators. Heart failure and mortality outcomes in patients with type 2 diabetes taking alogliptin versus placebo in EXAMINE: a multicentre, randomised, double-blind trial. *Lancet*. 2015 May 23;385(9982):2067-76.
14. Green JB, Bethel MA, Armstrong PW, Buse JB, Engel SS, Garg J, Josse R, Kaufman KD, Koglin J, Korn S, Lachin JM, McGuire DK, Pencina MJ, Standl E, Stein PP, Suryawanshi S, Van de Werf F, Peterson ED, Holman RR; TECOS Study Group. Effect of Sitagliptin on Cardiovascular Outcomes in Type 2 Diabetes. *N Engl J Med*. 2015 Jul 16;373(3):232-42.
15. European Society of Cardiology Press Office. New TECOS analysis adds heart failure data for sitagliptin. <http://www.escardio.org/The-ESC/Press-Office/Press-releases/Last-5-years/new-tecos-analysis-adds-heart-failure-data-for-sitagliptin> (accessed July 16 2016).
16. Barry AR, Turgeon RD. DPP-4 Inhibitors: The Seinfeld of Oral Antihyperglycemics. *Can J Hosp Pharm*. 2016 May-Jun;69(3):253-4.
17. FDA Drug Safety Communication: FDA adds warnings about heart failure risk to labels of type 2 diabetes medicines containing saxagliptin and alogliptin. Available: <http://www.fda.gov/Drugs/DrugSafety/ucm486096.htm> (accessed July 16 2016).
18. Marso SP, Daniels GH, Brown-Frandsen K, Kristensen P, Mann JF, Nauck MA, Nissen SE, Pocock S, Poulter NR, Ravn LS, Steinberg WM, Stockner M, Zinman B, Bergenstal RM, Buse JB; LEADER Steering Committee on behalf of the LEADER Trial Investigators. Liraglutide and Cardiovascular Outcomes in Type 2 Diabetes. *N Engl J Med*. 2016 Jun 13.
19. Pfeffer MA, Claggett B, Diaz R, Dickstein K, Gerstein HC, Køber LV, Lawson FC, Ping L, Wei X, Lewis EF, Maggioni AP, McMurray JJ, Probstfeld JL, Riddle MC, Solomon SD, Tardif JC; ELIXA Investigators. Lixisenatide in Patients with Type 2 Diabetes and Acute Coronary Syndrome. *N Engl J Med*. 2015 Dec 3;373(23):2247-57.
20. Zinman B, Wanner C, Lachin JM, Fitchett D, Bluhmki E, Hantel S, Matthews M, Devins T, Johansen OE, Woerle HJ, Broedl UC, Inzucchi SE; EMPA-REG OUTCOME Investigators. Empagliflozin, Cardiovascular Outcomes, and Mortality in Type 2 Diabetes. *N Engl J Med*. 2015 Nov 26;373(22):2117-28.
21. ORIGIN Trial Investigators, Gerstein HC, Bosch J, Dagenais GR, Díaz R, Jung H, Maggioni AP, Pogue J, Probstfeld J, Ramachandran A, Riddle MC, Rydén LE, Yusuf S. Basal insulin and cardiovascular and other outcomes in dysglycemia. *N Engl J Med*. 2012 Jul 26;367(4):319-28.
22. Abraira C, Colwell J, Nuttall F, Sawin CT, Henderson W, Comstock JP, Emanuele NV, Levin SR, Pacold I, Lee HS. Cardiovascular events and correlates in the Veterans Affairs Diabetes Feasibility Trial. *Veterans Affairs Cooperative Study on Glycemic Control and Complications in Type II Diabetes*. *Arch Intern Med*. 1997 Jan 27;157(2):181-8.
23. McMurray JJV, Solomon SD, Inzucchi SE; DAPA-HF Trial Committees and Investigators. Dapagliflozin in Patients with Heart Failure and Reduced Ejection Fraction. *N Engl J Med*. 2019 Sep 19. doi: 10.1056/NEJMoa1911303.

## References: Other

1. Dormandy JA, Charbonnel B, Eckland DJ, Erdmann E, Massi-Benedetti M, Moules IK, Skene AM, Tan MH, Lefèbvre PJ, Murray GD, Standl E, Wilcox RG, Wilhelmsen L, Betteridge J, Birkeland K, Golay A, Heine RJ, Korányi L, Laakso M, Mokán M, Norkus A, Pirags V, Podar T, Scheen A, Scherbaum W, Scherthaner G, Schmitz O, Skrha J, Smith U, Taton J; PROactive Investigators. Secondary prevention of macrovascular events in patients with type 2 diabetes in the PROactive Study (PROspective pioglitAzone Clinical Trial In macroVascular Events): a randomized controlled trial. *Lancet*. 2005 Oct 8;366(9493):1279-89.
2. Home PD, Pocock SJ, Beck-Nielsen H, Curtis PS, Gomis R, Hanefeld M, Jones NP, Komajda M, McMurray JJ; RECORD Study Team. Rosiglitazone evaluated for cardiovascular outcomes in oral agent combination therapy for type 2 diabetes(RECORD): a multicentre, randomised, open-label trial. *Lancet*. 2009 Jun 20;373(9681):2125-35.
3. DREAM (Diabetes REDuction Assessment with ramipril and rosiglitazone Medication) Trial Investigators, Gerstein HC, Yusuf S, Bosch J, Pogue J, Sheridan P, Dinccag N, Hanefeld M, Hoogwerf B, Laakso M, Mohan V, Shaw J, Zinman B, Holman RR. Effect of rosiglitazone on the frequency of diabetes in patients with impaired glucose tolerance or impaired fasting glucose: a randomised controlled trial. *Lancet*. 2006 Sep 23;368(9541):1096-105.
4. Manufacturers of Some Diabetes Drugs to Strengthen Warning on Heart Failure Risk-Companies Will Include Boxed Warning on Drug Label. Available: <http://www.fda.gov/NewsEvents/Newsroom/PressAnnouncements/2007/ucm108966.htm> (accessed July 21 2016).
5. Updated labelling for diabetes drug ACTOS and risk of heart failure. Available: <http://www.healthycanadians.gc.ca/recall-alert-rappel-avis/hc-sc/2008/13269a-eng.php> (accessed July 21 2016).  
Information for Healthcare Professionals Rosiglitazone maleate (marketed as Avandia, Avandamet, and Avandaryl). Available: [http://www.fda.gov/Drugs/DrugSafety/PostmarketDrugSafetyInformationforPatientsandProviders/ucm143406.htm#2007\\_7](http://www.fda.gov/Drugs/DrugSafety/PostmarketDrugSafetyInformationforPatientsandProviders/ucm143406.htm#2007_7) (accessed July 21 2016).
6. Dormandy J, Bhattacharya M, van Troostenburg de Bruyn AR; PROactive investigators. Safety and tolerability of pioglitazone in high-risk patients with type 2 diabetes: an overview of data from PROactive. *Drug Saf*. 2009;32(3):187-202.
7. Viberti G, Kahn SE, Greene DA, Herman WH, Zinman B, Holman RR, Haffner SM, Levy D, Lachin JM, Berry RA, Heise MA, Jones NP, Freed MI. A diabetes outcome progression trial (ADOPT): an international multicenter study of the comparative efficacy of rosiglitazone, glyburide, and metformin in recently diagnosed type 2 diabetes. *Diabetes Care*. 2002 Oct;25(10):1737-43.
8. Observation of an Increased Incidence of Fractures in Female Patients Who Received Long-Term Treatment with ACTOSO (pioglitazone HOI) Tablets for Type 2 Diabetes Mellitus. Available:<http://www.fda.gov/downloads/Safety/MedWatch/SafetyInformation/SafetyAlertsforHumanMedicalProducts/ucm153896.pdf> (accessed July 21 2016).
9. Clinical Trial Observation of an Increased Incidence of Fractures in Female Patients Who Received Long-Term Treatment with Avandia® (rosiglitazone maleate) Tablets for Type 2 Diabetes Mellitus. Available: <http://www.fda.gov/downloads/Safety/MedWatch/SafetyInformation/SafetyAlertsforHumanMedicalProducts/ucm153903.pdf> (accessed July 21 2016).
10. Idris I, Warren G, Donnelly R. Association between thiazolidinedione treatment and risk of macular edema among patients with type 2 diabetes. *Arch Intern Med*. 2012 Jul 9;172(13):1005-11.
11. Ambrosius WT, Danis RP, Goff DC Jr, Greven CM, Gerstein HC, Cohen RM, Riddle MC, Miller ME, Buse JB, Bonds DE, Peterson KA, Rosenberg YD, Perdue LH, Esser BA, Seaquist LA, Felicetta JV, Chew EY; ACCORD Study Group. Lack of association between thiazolidinediones and macular edema in type 2 diabetes: the ACCORD eye substudy. *Arch Ophthalmol*. 2010 Mar;128(3):312-8.



12. Association of Avandia (rosiglitazone) and Avandamet (rosiglitazone/metformin) with new onset and/or worsening of macular edema-for health professionals. Available: <http://www.healthycanadians.gc.ca/recall-alert-rappel-avis/hc-sc/2005/14308a-eng.php> (accessed July 21 2016).
13. Neumann A, Weill A, Ricordeau P, Fagot JP, Alla F, Allemand H. Pioglitazone and risk of bladder cancer among diabetic patients in France: a population-based cohort study. *Diabetologia*. 2012 Jul;55(7):1953-62.
14. Lewis JD, Ferrara A, Peng T, Hedderson M, Bilker WB, Quesenberry CP Jr, Vaughn DJ, Nessel L, Selby J, Strom BL. Risk of bladder cancer among diabetic patients treated with pioglitazone: interim report of a longitudinal cohort study. *Diabetes Care*. 2011 Apr;34(4):916-22.
15. ACTOS (pioglitazone hydrochloride) – Potential association with bladder cancer. Available: <http://www.healthycanadians.gc.ca/recall-alert-rappel-avis/hc-sc/2012/15854a-eng.php> (accessed July 21 2016).
16. FDA Drug Safety Communication: Update to ongoing safety review of Actos (pioglitazone) and increased risk of bladder cancer. Available: <http://www.fda.gov/Drugs/DrugSafety/ucm259150.htm> (accessed July 21 2016).
17. DREAM (Diabetes Reduction Assessment with ramipril and rosiglitazone Medication) Trial Investigators, Gerstein HC, Yusuf S, Bosch J, Pogue J, Sheridan P, Dinccag N, Hanefeld M, Hoogwerf B, Laakso M, Mohan V, Shaw J, Zinman B, Holman RR. Effect of rosiglitazone on the frequency of diabetes in patients with impaired glucose tolerance or impaired fasting glucose: a randomised controlled trial. *Lancet*. 2006 Sep 23;368(9541):1096-105.
18. Nissen SE, Wolski K. Effect of rosiglitazone on the risk of myocardial infarction and death from cardiovascular causes. *N Engl J Med*. 2007 Jun 14;356(24):2457-71. Epub 2007 May 21.
19. Viberti G, Kahn SE, Greene DA, Herman WH, Zinman B, Holman RR, Haffner SM, Levy D, Lachin JM, Berry RA, Heise MA, Jones NP, Freed MI. A diabetes outcome progression trial (ADOPT): an international multicenter study of the comparative efficacy of rosiglitazone, glyburide, and metformin in recently diagnosed type 2 diabetes. *Diabetes Care*. 2002 Oct;25(10):1737-43.
20. AVANDIA, AVANDAMET, AVANDARYL-Important New Restrictions on the Use of Rosiglitazone Products Due to Information on Cardiovascular Related Events: For Health Professionals. Available: <http://www.healthycanadians.gc.ca/recall-alert-rappel-avis/hc-sc/2010/14591a-eng.php> (accessed July 21 2016).
21. FDA Drug Safety Communication: FDA requires removal of some prescribing and dispensing restrictions for rosiglitazone-containing diabetes medicines. Available <http://www.fda.gov/Drugs/DrugSafety/ucm376389.htm> (accessed July 21 2016).
22. FDA Drug Safety Communication: FDA adds warnings about heart failure risk to labels of type 2 diabetes medicines containing saxagliptin and alogliptin. Available: <http://www.fda.gov/Drugs/DrugSafety/ucm486096.htm> (accessed July 21 2016).
23. FDA Drug Safety Communication: FDA warns that DPP-4 inhibitors for type 2 diabetes may cause severe joint pain. Available: <http://www.fda.gov/Drugs/DrugSafety/ucm459579.htm> (accessed July 21 2016).
24. FDA Drug Safety Communication: FDA investigating reports of possible increased risk of pancreatitis and pre-cancerous findings of the pancreas from incretin mimetic drugs for type 2 diabetes <http://www.fda.gov/Drugs/DrugSafety/ucm343187.htm> (accessed July 21 2016).
- 24a. Tkáč I, Raz I. Combined Analysis of Three Large Interventional Trials With Gliptins Indicates Increased Incidence of Acute Pancreatitis in Patients With Type 2 Diabetes. *Diabetes Care*. 2017 Feb;40(2):284-286. doi: 10.2337/dc15-1707. Epub 2016 Sep 22.
25. Singh S, Chang HY, Richards TM, Weiner JP, Clark JM, Segal JB. Glucagonlike peptide 1-based therapies and risk of hospitalization for acute pancreatitis in type 2 diabetes mellitus: a population-based matched case-control study. *JAMA Intern Med*. 2013 Apr 8;173(7):534-9.
26. Postmarket Drug Safety Information for Healthcare Professionals: Exenatide (marketed as Byetta)- 8/2008 update. Available: <http://www.fda.gov/Drugs/DrugSafety/PostmarketDrugSafetyInformationforPatientsandProviders/ucm124713.htm> (accessed July 21 2016).
27. Postmarket Drug Safety Information for Healthcare Professionals: Acute pancreatitis and sitagliptin (marketed as Januvia and Jaumet) Available: <http://www.fda.gov/Drugs/DrugSafety/PostmarketDrugSafetyInformationforPatientsandProviders/ucm124713.htm> <http://www.fda.gov/Drugs/DrugSafety/PostmarketDrugSafetyInformationforPatientsandProviders/DrugSafetyInformationforHealthcareProfessionals/ucm183764.htm> (accessed July 21 2016).
28. Canadian Adverse Reaction Newsletter: Incretin-based therapies and the risk of pancreatic cancer. <http://www.fda.gov/Drugs/DrugSafety/PostmarketDrugSafetyInformationforPatientsandProviders/ucm124713.htm> Incretin-based therapies and the risk of pancreatic cancer. *Canadian Adverse Reaction Newsletter* 2014;24:4. Available: [http://www.hc-sc.gc.ca/dhp-mps/medeff/bulletin/carn-bcei\\_v24n4-eng.php](http://www.hc-sc.gc.ca/dhp-mps/medeff/bulletin/carn-bcei_v24n4-eng.php) (accessed July 21 2016).
29. Victoza (liraglutide [rDNA origin]) Injection: REMS - Risk of Thyroid C-cell Tumors, Acute Pancreatitis. Available: <http://www.fda.gov/Safety/MedWatch/SafetyInformation/SafetyAlertsforHumanMedicalProducts/ucm258826.htm> (accessed July 12, 2016).
30. Madsbad S. Review of head-to-head comparisons of glucagon-like peptide-1 receptor agonists. *Diabetes Obes Metab*. 2016 Apr;18(4):317-32.
31. Trujillo JM, Nuffer W, Ellis SL. GLP-1 receptor agonists: a review of head-to-head clinical studies. *Ther Adv Endocrinol Metab*. 2015 Feb;6(1):19-28.
32. Rosenstock J, Balas B, Charbonnel B et al. The fate of tasoglutide, a weekly GLP-1 receptor agonist, versus twice-daily exenatide for type 2 diabetes. *Diabetes Care* 2013; 36: 498–504.
33. Blevins T, Pullman J, Malloy J et al. DURATION-5: exenatide once weekly resulted in greater improvements in glycemic control compared with exenatide twice daily in patients with type 2 diabetes. *J Clin Endocrinol Metab* 2011; 96: 1301–1310.
34. Pratlery RE, Nauck MA, Barnett AH et al. Once-weekly albiglutide versus once-daily liraglutide in patients with type 2 diabetes inadequately controlled on oral drugs (HARMONY 7): a randomised, open-label, multicentre, non-inferiority phase 3 study. *Lancet Diabetes Endocrinol* 2014; 2: 289–297.
35. Buse JB, Nauck M, Forst T et al. Exenatide once weekly versus liraglutide once daily in patients with type 2 diabetes (DURATION-6): a randomised, open-label study. *Lancet* 2013; 381: 117–124.
36. Dungan KM, Povedano ST, Forst T et al. Once-weekly dulaglutide versus once-daily liraglutide in metformin-treated patients with type 2 diabetes (AWARD-6): a randomised, open-label, phase 3, non-inferiority trial. *Lancet* 2014; 384: 1349–1357.
37. Summary Safety Review- SGLT2 Inhibitors (canagliflozin, dapagliflozin, empagliflozin)- Assessing the risk of the body producing high levels of acid in the blood (diabetic ketoacidosis). Available: <http://www.hc-sc.gc.ca/dhp-mps/medeff/reviews-examens/sglt2-eng.php> (accessed July 12, 2016).
38. FDA Drug Safety Communication: FDA revises labels of SGLT2 inhibitors for diabetes to include warnings about too much acid in the blood and serious urinary tract infections. Available: <http://www.fda.gov/Drugs/DrugSafety/ucm475463.htm> (accessed July 21 2016).
39. Summary Safety Review- SGLT2 Inhibitors INVOKANA (canagliflozin) and FORXIGA (dapagliflozin)- Evaluation of a Potential Risk of Acute Kidney Injury. Available: <http://www.hc-sc.gc.ca/dhp-mps/medeff/reviews-examens/sglt2-eng.php> (accessed July 21 2016).
40. FDA Drug Safety Communication: FDA strengthens kidney warnings for diabetes medicines canagliflozin (Invokana, Invokamet) and dapagliflozin (Farxiga, Xigduo XR). Available: <http://www.fda.gov/Drugs/DrugSafety/ucm505860.htm> (accessed July 12, 2016).
41. FDA Drug Safety Communication: FDA revises label of diabetes drug canagliflozin (Invokana, Invokamet) to include updates on bone fracture risk and new information on decreased bone mineral density. Available: <http://www.fda.gov/Drugs/DrugSafety/ucm461449.htm> (accessed July 21 2016).
42. FDA Drug Safety Communication: Interim clinical trial results find increased risk of leg and foot amputations, mostly affecting the toes, with the diabetes medicine canagliflozin (Invokana, Invokamet); FDA to investigate. Available: <http://www.fda.gov/Drugs/DrugSafety/ucm500965.htm> (accessed July 21 2016).
43. Drug safety update Canagliflozin (Invokana, Vokanamet): signal of increased risk of lower extremity amputations observed in trial in high cardiovascular risk patients. Available: <https://www.gov.uk/drug-safety-update/canagliflozin-invokana-vokanamet-signal-of-increased-risk-of-lower-extremity-amputations-observed-in-trial-in-high-cardiovascular-risk-patients> (accessed July 21 2016).
44. Vasilakou D, Karagiannis T, Athanasidou E, Mainou M, Liakos A, Bekiari E, Sarigianni M, Matthews DR, Tsapas A. Sodium-glucose cotransporter 2 inhibitors for type 2 diabetes: a systematic review and meta-analysis. *Ann Intern Med*. 2013 Aug 20;159(4):262-74.
45. Lin HW, Tseng CH. A Review on the Relationship between SGLT2 Inhibitors and Cancer. *Int J Endocrinol*. 2014;2014:719578.
46. Faillie JL, Yu OH, Yin H, Hillaire-Buys D, Barkun A, Azoulay L. Association of Bile Duct and Gallbladder Diseases With the Use of Incretin-Based Drugs in Patients With Type 2 Diabetes Mellitus. *JAMA Intern Med*. 2016 Oct 1;176(10):1474-1481.
47. Puckrin R, Salties MP, Reynier P, Azoulay L, Yu OHY, Filion KB. SGLT-2 inhibitors and the risk of infections: a systematic review and meta-analysis of randomized controlled trials. *Acta Diabetol*. 2018 May;55(5):503-514.
48. Dave CV, Schneeweiss S, Kim D, Fralick M, Tong A, Patorno E. Sodium-Glucose Cotransporter-2 Inhibitors and the Risk for Severe Urinary Tract Infections: A Population-Based Cohort Study. *Ann Intern Med*. 2019 Jul 30. Accessed online 02 Dec 2019 at <https://annals.org/aim/article-abstract/2739786/sodium-glucose-cotransporter-2-inhibitors-risk-severe-urinary-tract-infections?searchresult=1>

**DISCLAIMER:** The content of this newsletter represents the research, experience and opinions of the authors and not those of the Board or Administration of the University of Saskatchewan. Neither the authors nor U of S nor any other party who has been involved in the preparation or publication of this work warrants or represents that the information contained herein is accurate or complete, and they are not responsible for any errors or omissions or for the result obtained from the use of such information. Any use of the newsletter will imply acknowledgment of this disclaimer and release any responsibility of U of S, its employees, servants or agents. Readers are encouraged to confirm the information contained herein with other sources. Additional information and references online at [www.RxFiles.ca](http://www.RxFiles.ca)
